1 Cervical gene delivery of the antimicrobial peptide, Human  $\beta$ -defensin (HBD)-3, in a mouse model of  
2 ascending infection-related preterm birth

3 Suff, Natalie<sup>1,2,3</sup>, Karda, Rajvinder<sup>1</sup>, Antinao Diaz, Juan<sup>1</sup>, Ng, Joanne<sup>1</sup>, Baruteau, Julien<sup>1,4</sup>, Perocheau,  
4 Dany<sup>1</sup>, Taylor, Peter W.<sup>5</sup>, Alber, Dagmar<sup>6</sup>, Buckley, Suzanne M.K.<sup>1</sup>, Bajaj-Elliott, Mona<sup>2,6</sup>, Waddington,  
5 Simon N.<sup>\*1,7</sup> and Peebles, Donald<sup>2</sup>.

6 \*Corresponding author

7 <sup>1</sup> Gene Transfer Technology Group, Department of Maternal and Fetal medicine, Institute for  
8 Women's Health, University College London, 86-96 Chenies Mews, London, WC1E 6HX, UK

9 <sup>2</sup> Preterm Birth Group, Department of Maternal and Fetal medicine, Institute for Women's Health,  
10 University College London, 86-96 Chenies Mews, London, WC1E 6HX, UK

11 <sup>3</sup> Preterm Birth Group, Department of Women and Children's Health, King's College London, St  
12 Thomas' Hospital, Westminster Bridge road, London, SE1 7EH, UK

13 <sup>4</sup> Metabolic Medicine, Great Ormond Street Hospital for Children NHS Foundation Trust, 30 Guilford  
14 St, London WC1N 1EH, UK

15 <sup>5</sup> University College London School of Pharmacy, 29-39 Brunswick Square, London, WC1N 1AX, UK

16 <sup>6</sup> Great Ormond Street Institute of Child Health, 30 Guilford St, London WC1N 1EH, UK

17 <sup>7</sup> SA/MRC Antiviral Gene Therapy Research Unit, Faculty of Health Sciences, University of the  
18 Witwatersrand, Johannesburg, South Africa

19 Conflict of interest: The authors have declared that no conflict of interest exists

20 Acknowledgments:

21 NS received funding from the Wellbeing of Women Research training fellowship grant RT414 and the  
22 Priory foundation. SNW received funding from UK Medical Research Council grants; G1000709 and  
23 MR/N026101/1, MR/R015325/1, MR/P026494/1 and MR/N019075/1, and from SPARKS 17UCL01.  
24 RK received funding from grants; MR/P026494/1, SPARKS grant 17UCL01. JN received funding from  
25 grants; MR/K02342X/1, GOSHCCV1284, Rosetrees M576. JB received funding from a Research  
26 Training Fellowship from Action Medical Research grant GN2137. DMP receives support from the  
27 UCLH NIHR Biomedical Research Centre. *E.coli* K1 A192PP-lux2 was derived by virtue of a project  
28 grant from Action Medical Research GN2075 awarded to PWT. We thank Dr Grace Logan for the  
29 analysis of the vaginal microbiome 16S sequencing data.

30

31

1 Author contributions:

2 N.S., R.K., J.N., J.B., D.P. and J.A. performed experiments. N.S., S.M.K.B., D.A., M.B., P.W.T., S.N.W.  
3 and D.P. designed experiments, analysed, and interpreted data. N.S. wrote the manuscript. S.N.W.,  
4 D.P., and M.B-E edited the manuscript.

5

## 6 **Abstract**

7 Approximately 40% of preterm births are preceded by microbial invasion of the intrauterine space:  
8 ascent from the vagina is the most common pathway. Within the cervical canal, antimicrobial  
9 peptides and proteins (AMPs) help to constitute a barrier which prevents ascending infection. We  
10 investigated whether expression of the AMP, human  $\beta$ -defensin-3 (HBD3), in the cervical mucosa  
11 prevented bacterial ascent from the vagina into the uterine cavity of pregnant mice. An adeno-  
12 associated virus vector containing both the *HBD3* gene and *GFP* transgene (AAV8 HBD3.GFP) or  
13 control (AAV8 GFP), was administered intravaginally into E13.5 pregnant mice. Ascending infection  
14 was induced at E16.5 using bioluminescent *E.coli* (*E.coli* K1 A192PP-lux2). Bioluminescence imaging  
15 showed bacterial ascent into the uterine cavity, cellular events that led to premature delivery and a  
16 reduction in pups born alive, compared with uninfected controls. In addition, a significant reduction  
17 in uterine bioluminescence in the AAV8 HBD3.GFP-treated mice was observed 24 hours post-*E.coli*  
18 infection, compared to AAV8 GFP treated mice, signifying reduced bacterial ascent in AAV8  
19 HBD3.GFP-treated mice. There was also an increase in the number of living pups in AAV HBD3.GFP-  
20 treated mice. We propose that HBD3 may be considered a possible candidate for augmenting  
21 cervical innate immunity to prevent ascending infection-related preterm birth.

22

23

24

25

## 1 Introduction

2 Preterm birth, defined as delivery before 37 completed weeks gestation, affects 11% of pregnancies  
3 worldwide<sup>1</sup>. It is the single largest cause of mortality in infants under 5 years old and it is associated  
4 with serious morbidity in the surviving infants, particularly for those born before 32 weeks  
5 gestation<sup>2</sup>. Prematurity accounts for 29% of global neonatal deaths per year and for 3.1% of total  
6 disability adjusted life years in the global burden of disease<sup>3</sup>. Despite extensive research, the rates of  
7 preterm birth have remained stable over the years; this is thought to be largely due to a lack of  
8 effective preventative treatments.

9 Preterm birth is a highly complex, multifactorial biological process which culminates in the  
10 premature activation of the common parturition pathway<sup>4</sup>. Evidence indicates a role for infection  
11 and inflammation in preterm birth, particularly in those occurring before 28 weeks, and it is  
12 estimated to be associated with up to 40% of preterm deliveries<sup>5</sup>. In clinical studies, the increased  
13 prevalence and diversity of intrauterine bacterial DNA is associated with preterm pre-labour rupture  
14 of membranes and spontaneous preterm birth<sup>6</sup>. Bacteria linked with preterm birth include those  
15 genera associated with relatively low pathogenicity such as *Ureaplasma*, *Fusibacterium*, *Mycoplasma*  
16 and *Streptococcus*<sup>6</sup>. Once in the pregnant uterus, bacteria interact with the mucosal lining and the  
17 local immune system initiating an inflammatory cascade leading to cervical ripening and myometrial  
18 contractility, ultimately resulting in preterm parturition<sup>7</sup>. Animal models confirm this link;  
19 inoculation of the intrauterine cavity with live bacteria or bacterial pattern recognition pattern (PRR)  
20 moieties, such as lipopolysaccharide (LPS), leads to preterm birth<sup>8,9</sup>. In humans, this preterm  
21 inflammatory pathway has proved resistant to most therapies including antibiotics, cervical cerclage  
22 and tocolytics; meta-data analysis shows that progesterone appears to delay preterm birth, although  
23 its role in infection and inflammation remains unclear<sup>10</sup>.

24 Ascending vaginal infection is considered to be the most common route by which bacteria gain  
25 access into the uterine cavity in cases of spontaneous preterm birth<sup>11</sup>. This hypothesis is supported

1 by the association recorded between the bacterial species identified in the amniotic fluid, fetal  
2 membranes and placenta and those normally found in the lower genital tract<sup>6,12</sup>. Additionally,  
3 recent data suggests that dominance of a particular bacterial species within the vaginal microbiota  
4 are associated with an increased risk of preterm birth<sup>13</sup>.

5 The ability of the human cervix to prevent bacteria ascending from the vagina to the uterine cavity  
6 depends on several factors, including a mucus plug that provides a negatively-charged platform for  
7 interaction with cationic antimicrobial peptides (AMPs) including the Human  $\beta$ -defensins (HBDs)<sup>14,15</sup>.  
8 It is not known why certain women develop ascending infection; women who have had previous  
9 cervical excisional treatment are associated with an increased risk of preterm birth<sup>16</sup>, but it is likely  
10 that an endogenous compromise in cervical mucosal immunity plays a key role in these cases<sup>17</sup>. In  
11 support of this, recent evidence has shown an association between PTB and low mid-trimester  
12 cervico-vaginal levels of human  $\beta$ -defensin 2<sup>18</sup>.

13 HBDs, produced by the cervical epithelium, critical for maintaining mucosal host-microbial  
14 homeostasis<sup>19</sup>. In addition to their direct microbicidal role against pathogens, they mediate  
15 inflammation by influencing cytokine production, immune cell chemotaxis and epithelial cell  
16 proliferation<sup>20</sup>. Human  $\beta$ -defensin 3 (HBD3) has potent and broad-spectrum antimicrobial activity  
17 against bacteria, fungi and viruses<sup>21,22</sup>. Possessing multiple positively charged arginine and lysine  
18 residues it has the highest net positive charge of all AMPs which probably contributes to its broad-  
19 spectrum action. Its antimicrobial activity is not affected by differing physiological salt  
20 concentrations, making it an ideal choice for a clinical treatment<sup>21</sup>. Furthermore, unlike other  $\beta$ -  
21 defensins, HBD3 binds to bacterial products, such as LPS, resulting in reduced pro-inflammatory  
22 cytokine responses<sup>23</sup>.

23 The transfer and expression of therapeutic genes in the context of cervical mucosa has been  
24 explored as a potential treatment for infectious diseases. For example, anti-HIV antibodies have  
25 been delivered using an adeno-associated viral vector (AAV) to human cervical and vaginal cells *in*

1 *vitro* and also to the lower genital tract of rhesus macaques to successfully prevent mucosal  
2 acquisition of HIV infection *in vivo*<sup>24,25</sup>. Gene transfer to the murine cervix, however, has not been  
3 described before, although the use of adenoviral vectors to deliver specific pro-inflammatory  
4 cytokines to the mouse vagina has been explored as a possible treatment for vaginal candidiasis<sup>26</sup>.

5 The objectives of our present study were to evaluate the function of the HBD3 gene, delivered to the  
6 cervix using AAV8, in a mouse model of ascending infection-related preterm birth. We have  
7 previously established an ascending infection-model of preterm birth using bioluminescent *E.coli* K1  
8 A192PP-*lux2* (*E.coli* K1)<sup>27,28</sup>, a strain known to cause neonatal sepsis and meningitis in rats. In this  
9 model, *E.coli* K1 administration induced delivery significantly earlier than in pregnant mice receiving  
10 intravaginal PBS as well as leading to a significant reduction in the proportion of pups born alive  
11 compared with intravaginal PBS controls<sup>28</sup>.

12 Here, we tested the hypothesis that cervical gene expression of HBD3 reduces microbial ascension  
13 into the pregnant uterine cavity, reducing the frequency of preterm birth.

## 14 **Results**

### 15 *A murine model of ascending bacterial infection and preterm birth*

16 The murine model of infection was essentially as described previously by our laboratory<sup>28</sup>. The ability  
17 of a pathogenic strain of *E.coli* K1 A192PP-*lux2* (*E.coli* K1) to ascend into the embryonic day 16.5  
18 pregnant uterine cavity was investigated<sup>28</sup>. Bioluminescence imaging of the dam revealed ascent of  
19 bacteria to the top of the uterine cavity by 24 hours (Fig.1A), with diffuse spread of bacteria in the  
20 fetal membranes, the placenta and the amniotic fluid by 18 hours (Fig.1B). By 24 hours bacteria were  
21 evident in the fetus (Fig.1C); immunoperoxidase staining for bacteria revealed microbial presence  
22 within the respiratory and gastro-intestinal (GI) tract (Fig.1D). By postnatal day 1 (approximately 72  
23 hours post-infection), bacteria were predominantly seen in the GI tract (Fig.1E).

### 24 *Selection of viral vector for optimal gene transfer to the cervical mucosa*

1 To determine if viral vectors are capable of delivering genes to the cervical mucosa, separate cohorts  
2 of non-pregnant adult mice received intravaginal delivery of either adeno-associated virus serotype  
3 2/8 (AAV8), recombinant adenovirus serotype 5 (rAD5) and VSVg pseudotyped HIV lentivirus, each  
4 containing the firefly luciferase transgene. Luciferase expression was seen in the lower genital tract  
5 48 hours to 120 hours after vector administration (Fig. 2A). Although there was high luciferase  
6 activity from VsVG pseudo-typed HIV lentivirus, AAV was chosen for the ensuing studies due to its  
7 relatively low immunogenicity, episomal-nature, thermostability and success in numerous clinical  
8 trials<sup>29–31</sup>. Following AAV8 administration, it was confined to the upper vagina and cervix at 72 hours  
9 with no spread to the uterus or liver (Fig. 2B and Fig.2C). This vector was used for the remaining  
10 experiments due to its relatively low immunogenicity and success in a wide range of pre-clinical and  
11 clinical trials<sup>29,32</sup>.

#### 12 *Specific location of vaginal and cervical protein expression*

13 Thermosensitive pluronic gels have been developed for numerous functions, including vaginal drug  
14 delivery (26–28). We assessed AK12, that gels at 30 degrees Celsius, as a method to prolong the  
15 contact time of the vector with the epithelium to improve transduction. Delivering AAV8 GFP in  
16 combination with this gel intravaginally resulted in significantly higher GFP expression than  
17 delivering vector alone ( $P=0.02$ , Fig.2D). This expression was co-localised with cytokeratin, a marker  
18 of the cervical epithelial cell layers (Fig.2E). Following AAV-8 luciferase intravaginal administration  
19 bioluminescence imaging revealed luciferase expression to be highest between 3 and 5 days after  
20 transduction and lasting for up to 14 days (Fig. 2F).

#### 21 *HBD3 expression and function*

22 Following intravaginal administration of AAV8 HBD3.GFP, HBD3 and GFP expression was co-localised  
23 in the cervical and upper vaginal epithelium after 72 hours (Fig.3A). HBD3 was detected in the  
24 vaginal lavage 96 hours after vector administration, indicating that the HBD3 peptide was  
25 appropriately synthesised and secreted into the mouse cervix and vagina (Fig.3B).

1 We performed *E.coli* killing assays with these lavages. A trend for bactericidal activity was observed  
2 in AAV HBD3.GFP treated *versus* PBS controls, but this did not reach statistical significance (Fig.4A).  
3 Immunohistochemical detection of neutrophils was performed on cervical tissue 72 hours after  
4 AAV.HBD3 GFP, AAV.GFP and PBS intravaginal administration (Fig.4B). This showed a significant  
5 increase in neutrophil recruitment to the cervical epithelium layer in the AAV8 HBD3.GFP group 72  
6 hours after vector administration, compared with the AAV8 GFP and PBS only controls ( $P=0.009$  and  
7  $P=0.017$ , respectively, Fig.4C).

8 Vaginal lavage samples were taken before- and at multiple time points after- vector or PBS  
9 administration to investigate the effect of HBD3 on the vaginal microbiome. Delivery of AAV8  
10 HBD3.GFP had no effect on the alpha diversity index (Supplementary Fig.1A) or the distribution of  
11 bacterial classes compared to the AAV8 GFP control group was similar before and after vector  
12 administration (Supplementary Fig.1B).

### 13 *HBD3 gene delivery to prevent ascending infection*

14 Next we investigated the effects of AAV8 HBD3.GFP delivery on ascending infection and preterm  
15 birth. AAV8 HBD3.GFP or AAV8 GFP control was administered to the vaginas of pregnant dams on  
16 embryonic day 13.5, followed by administration of *E.coli* K1 intravaginally on embryonic day 16.5.  
17 Representative images of an AAV8 HBD3.GFP treated and AAV8 GFP control mouse are shown in  
18 Fig.5A. AAV8 HBD3.GFP administration resulted in significantly less uterine bacterial  
19 bioluminescence, a marker of bacterial ascent, at embryonic day 17.5 ( $P=0.0015$ ). A similar trend at  
20 embryonic day 18.5 did not reach statistical significance ( $P=0.09$ ) (Fig.5B).

21 The reduced ascent of bacteria into the uterine cavity in the AAV8 HBD3.GFP group led us to  
22 hypothesise that this group would also have reduced preterm birth rates. Delivery within 48 hours  
23 (embryonic day 18.5) of intravaginal administration of *E.coli* K1 was considered preterm birth,  
24 whereas mice delivering after this point was considered term. AAV8 HBD3.GFP resulted in a small,

1 nonsignificant reduction in preterm labour to 60% versus 78% in AAV8 GFP controls ( $P=0.37$ , Table  
2 1).

3 The AAV8 HBD3.GFP group delivered significantly earlier than the control mice not infected with  
4 bacteria (mean  $50.7\text{h} \pm 11.4$  vs.  $65.5\text{h} \pm 6.3$ ,  $P=0.01$ , Fig.5C) and the mean time of delivery was not  
5 significantly different from that of the AAV8 GFP group (mean  $50.7\text{h} \pm 11.4$  vs.  $46.1 \pm 8.0$ ,  $P=0.95$ , Fig  
6 5C).

7 AAV HBD3.GFP treatment significantly increased the proportions of live pups, versus AAV8 GFP  
8 controls (0.86 vs 0.54 respectively (Fig.5D), Unpaired t-test;  $P=0.028$ ) but did not increase survival  
9 rates at seven days (AAV8 HBD3.GFP 60.3% vs AAV8 GFP 55.9%,  $P=0.2$ ) (Fig.6A). However, there was  
10 a small non-significant increase in survival in those pups born at term in the AAV8 HBD3.GFP group  
11 (85.2% vs. 62.5%, respectively,  $P=0.16$ , Fig.6B).

## 12 Discussion

13 Despite recent advances in preterm birth research, current therapies do not appear to have an  
14 impact on preterm birth rates<sup>36</sup>. Approximately 40% of preterm births are thought to be associated  
15 with infection, specifically ascending infection from the vagina and despite this knowledge,  
16 prophylactic antibiotics have not been shown to alter preterm birth rates<sup>37</sup>. Here, we show that a  
17 localised cervical treatment, which delivers an endogenous human gene with antimicrobial  
18 properties, can reduce ascending infection in pregnant mice and lead to an increase in neonatal  
19 survival.

20 We show that gene delivery to the murine cervix is possible using common viral vectors and is  
21 augmented by the use of thermosensitive pluronic gel. In contrast to the human cervix, the entirety  
22 of the murine cervix comprises stratified squamous epithelium<sup>38</sup>. Although little is known about the  
23 mouse cervix, we do know that one layer of the 28-layer human vaginal and ectocervical stratified  
24 squamous epithelium sheds every four hours<sup>39</sup> and so pluronic gels may improve transduction



1 efficiencies by increasing contact time of vector with epithelium. Pluronic gels have previously been  
2 used in combination with adenovirus vector to deliver VEGF to the uterine circulation as a treatment  
3 for fetal growth restriction<sup>40</sup>. The benefits of these gels are that they are biodegradable, low in  
4 toxicity and they transfer from aqueous phase to gel phase on increasing temperature. We chose the  
5 AK12 gel for our experiments as its gelling temperature of 30°C means that it forms a gel quickly  
6 upon intravaginal application preventing vector spillage and it also seemed appropriate for a plug  
7 that would be exposed to the cooler outside environment at the vaginal introitus. Furthermore,  
8 there is evidence that pluronic gels help to facilitate cervico-mucus plug penetration without  
9 comprising the function of the barrier<sup>41</sup>.

10 AAV8 HBD3.GFP did not significantly increase the gestational length in *E.coli* K1 infected dams.  
11 However, there was an increase in the proportion of pups born alive from dams in this group with a  
12 tendency towards increased 7 day survival rates for neonates born at term following *E.coli* K1  
13 infection. There was no increase in preterm pup survival in the first week of life, however, suggesting  
14 that pups delivered early are more susceptible to *E.coli* K1 infection.

15 The mechanisms by which cervical HBD3 reduces bacterial ascent into the uterine cavity is uncertain.  
16 Although HBD3 is known for its potent antimicrobial action, we were unable to measure a statistical  
17 difference in the microbicidal activity of the vaginal lavage from AAV8 HBD3.GFP *versus* AAV8 GFP  
18 treated mice in the experimental time frame. Interestingly, within the same time frame, the  
19 presence of HBD3 resulted in an increase in neutrophil influx into the cervical epithelium *in vivo*.  
20 Therefore, it is likely that HBD3-mediated bacterial clearance involves activation of multiple  
21 antimicrobial mechanism(s). A study looking at the benefits of exogenously delivered human  
22 cathelicidin LL-37 in a murine model of *P.aeruginosa* lung infection found that cathelicidin LL-37  
23 enhanced bacterial clearance *in vivo*<sup>42</sup>. Interestingly, the authors found no evidence of a direct  
24 microbicidal effect and it was concluded that the likely mechanism of bacterial clearance is peptide-  
25 mediated enhanced early neutrophil influx. Our observations also support a crucial role for HBD3-

1 driven neutrophil influx, taken together, it is tempting to suggest that neutrophil mediation may  
2 present a significant armoury of AMP action.

3 HBD-3 concentrations detected in the murine cervicovaginal lavage following gene transfer was  
4 lower than compared with physiological levels in human cervicovaginal lavage fluid (0.5ng/mg  
5 protein versus 55.5ng/mg protein)<sup>43</sup>. This may be primarily be due to species variation and/or due to  
6 the experimental setup of our current study e.g cervicovaginal samples were taken 72 hours  
7 following gene transfer whilst bioluminescence (indicative of HBD3 gene expression) continued to  
8 increase up to 96 hours post-gene delivery (Fig 2A). Future experiments, exploring dose-response  
9 and time course of expression will be valuable for providing further insight into HBD3 production.  
10 Cervicovaginal levels of endogenous mouse defensin proteins were not assessed, however, our  
11 unpublished data suggests a trend towards reduced *Defb14* (the gene for mBD14, the mouse  
12 orthologue of HBD-3) mRNA levels in the AAV8 HBD-3 treated cervixes raising the hypothesis that  
13 HBD-3 is involved in a negative feedback loop suppressing *Defb14* expression.

14 Recent data has shown that human cervical mucus plugs contain at least 28 AMPs, although  
15 interestingly, the AMPs were at insufficient concentrations to have antimicrobial activity against  
16 Group *B streptococcus*, a bacteria commonly implicated in preterm birth<sup>44</sup>. However, these AMP  
17 appear to have a role in amplifying the immune response including enhanced leucocyte activity and  
18 complement-mediated killing. In support of this, emerging evidence suggests that HBDs have a  
19 much more complex role in the immune system than being solely endogenous antimicrobials, they  
20 have previously been shown to recruit immune cells, such as neutrophils, macrophages and  
21 dendritic cells<sup>45,46</sup>. In contrast to our findings here, HBD-3 has previously been reported to have  
22 direct chemotactic activity on human monocytes and not neutrophils<sup>46</sup>. Our unpublished data  
23 showed minimal cervical monocyte influx. The chemotactic activity on murine neutrophils seen in  
24 this study, may be due to species variation and its mechanism, direct or indirect, needs to be  
25 elucidated in future studies. Neutrophils are critical effector cells and form part of the first line of

1 defence against microorganisms. HBD2 has been shown to attract neutrophils via the G-protein  
2 phospholipase C-dependent pathway<sup>45</sup>. The CCR6 receptor is involved in activation of this pathway;  
3 HBD3 and mouse  $\beta$ -defensin 14 are chemotactic for mouse CCR6-expressing HEK 293 cells *in*  
4 *vitro*<sup>47,48</sup>. Furthermore, the cysteine residues of the three disulphide bridge structure of HBD3 appear  
5 to be necessary for this chemotactic role<sup>49</sup>. In addition to its chemotactic role, HBD3 has been shown  
6 to prolong the lifespan of neutrophils at sites of infection by preventing apoptosis<sup>50</sup>. The molecular  
7 mechanism(s) involved in HBD3-mediated neutrophil influx in our model system require further  
8 investigation.

9 During human pregnancy, a rise in oestrogen levels leads to a stable vaginal microbiome dominated  
10 by *Lactobacillus* species<sup>51</sup>. *Lactobacillus* are thought to inhibit pathogen growth by secreting  
11 antimicrobial bacteriocins as well as producing lactic acid which helps to maintain a low, acidic pH<sup>52</sup>.  
12 The composition of the vaginal microbiota appears to be closely associated with preterm birth  
13 outcome<sup>13,53</sup>. Mice treated with either AAV8 HBD3.GFP or AAV8 GFP did not show significant  
14 changes in their vaginal microbiota nor did it modify *Lactobacillus* species abundance in the vagina  
15 (data not shown). In support of these findings, HBD3 does not exhibit antibacterial activity against  
16 lactic acid bacteria, including *L.rhamnosus*, suggesting that these bacteria may exhibit factors that  
17 protect them from host immune defence<sup>54</sup>. Recent data indicates an association between an *L.iners*-  
18 dominant vaginal microbiome and an increased risk of preterm birth, whilst *L.crispatus*-dominance  
19 appears to be protective<sup>13</sup>. *L.crispatus* promotes epithelial cell defence against *Candida albicans in*  
20 *vitro* by increasing HBD levels, in particular, HBD3<sup>55</sup>. This finding may play a role in linking the  
21 mechanism of *L.crispatus*-dominant vaginal microbiome with its protective effect on preterm birth.

22 HBD3 was previously considered to be pro-inflammatory as its expression increases following TLR  
23 activation or IL-1 $\beta$ , TNF- $\alpha$  and IFN- $\gamma$  release<sup>21,46</sup>, however, emerging data recognises it more as a  
24 multifunctional effector of the immune system<sup>56</sup>. It is possible that HBD3 may induce a strong  
25 chemoattractant and inflammatory response at high concentrations during infection and injury to

1 respond to the insult whilst at lower concentrations it has anti-inflammatory and healing  
2 properties<sup>57</sup>. In this study, we found no evidence of increased inflammatory cytokine expression in  
3 the cervical tissue following gene transfer of AAV.HBD3 GFP compared with AAV GFP  
4 (Supplementary Fig.3). Further studies would need to be conducted to assess for other surrogate  
5 markers of inflammation or cytotoxicity. In the GI tract, HBD3 plays an important role in  
6 contributing to mucosal immune tolerance<sup>58</sup>. As the vaginal microbial composition appears to be so  
7 closely related to preterm birth risk, HBD3 expression in the cervix may improve immune tolerance  
8 to certain commensal bacteria.

9 The use of antimicrobial gene therapy has been explored previously, mainly as a way of treating  
10 infections with antibiotic resistant bacteria and treating certain wound infections where the skin  
11 epithelium has been severely damaged, such as burns<sup>59</sup>. Gene delivery of HBD3 to keratinocytes  
12 using adenoviral vectors has been performed in studies investigating novel treatments for wound  
13 infections<sup>60,61</sup>. They show that keratinocytes expressing HBD3 *in vitro* have increased antimicrobial  
14 activity and interestingly found that the HBDs worked synergistically with the AMP, cathelicidin LL-  
15 37, in its antimicrobial activity against *E.coli* and *S. aureus*<sup>61</sup>. In an *in vivo* porcine model of infected  
16 diabetic wounds, adenoviral vectors delivering HBD3 resulted in reduced bacterial load 4 days after  
17 vector administration and an improvement in re-epithelialization of the wound<sup>60</sup>. The wound healing  
18 role of HBD3 may also be of interest in women at high risk of preterm birth who have had previous  
19 cervical treatment for high risk precancerous cervical lesions. The expression of HBD3, in  
20 combination with VEGF, in bone marrow derived stem cells resulted in improved wound healing in a  
21 model of combined radiation-wound injury in rats<sup>62</sup>. In particular, HBD3 is shown to promote skin re-  
22 epithelialization, granulation tissue formation and collagen I deposition. In preterm birth, premature  
23 remodelling and shortening of the cervix involves degradation of cervical stromal collagen,  
24 particularly collagen I and III, by matrix metalloproteinases<sup>63-65</sup>. Therefore, HBD3 gene therapy could  
25 help to inhibit this process by encouraging collagen I deposition.

1 Preterm birth remains a major global health problem, being responsible for greater than a million  
2 neonatal deaths per year<sup>66</sup>. Despite the employment of current preventative strategies for preterm  
3 birth, there has been no decline in preterm birth rates highlighting the importance of further  
4 research into novel therapies<sup>67</sup>. The use of HBD3 in augmenting cervical mucosal immunity may have  
5 a role in reducing the intra-uterine inflammation associated with ascending vaginal infection-related  
6 preterm birth and warrants further studies to explore its potential for clinical translation.

## 7 **Materials and Methods**

### 8 **Viral vector production**

9 The following viral vectors were used in this study; AAV2/8, VSV-g pseudotyped lentivirus,  
10 recombinant adenovirus serotype 5. The vectors carried the firefly luciferase or enhanced GFP  
11 transgene under the control of the cytomegalovirus (CMV) promoter. Lentiviral vectors were gifted  
12 from Dr Stephen Howe (University College London, UK). The adenoviral vectors were gifted from Dr  
13 Alan Parker (Cardiff University, UK). The AAV viral vectors were developed and purchased from  
14 Vector Biolabs (Malvern, USA).

15 An AAV8 bicistronic vector encapsidating a single-stranded DNA sequence containing the HBD3 gene  
16 (Vega Sanger HBD3 transcript VEGA68:CM000670.2) under the transcription activity of the CMV  
17 promoter, followed by the eGFP gene under the transcription activity of a further CMV promoter,  
18 and BGH polyA downstream from the HBD3 and eGFP gene was generated (Vector Biolabs, Malvern,  
19 USA) (Supplementary Figure 2).

### 20 **Animals and Treatments**

21 All animal studies were conducted under UK Home Office license 70/8030 and approved by the UCL  
22 ethical review committee.

1 C57BL/6N-Tyr<sup>c-Brd</sup> mice were obtained from the Charles River Laboratory (Oxford, UK) and adult mice  
2 (6-12 weeks) were time mated. The following morning (when a vaginal plug was noted) was  
3 designated as embryonic day 0.5.

#### 4 *Animal injections*

5 Adult (6-8 weeks old) female C57BL/6N-Tyr<sup>c-Brd</sup> mice were anaesthetised with isoflurane in 100%  
6 oxygen. 10µl of virus (diluted in PBS if necessary) to a concentration of 1x10<sup>12</sup> genomic copies/mL  
7 was administered intravaginally using a 200µl sterile pipette tip. This was applied in combination  
8 with 20µl of AK12 thermosensitive pluronic gel (PolySciTech, Indiana, U.S.A)

9 For pregnancy experiments, vector was administered as described above on embryonic day 13.5.

#### 10 *Ascending vaginal infection model*

11 The ascending vaginal infection model was developed using *E.coli* K1 A192PP modified to contain the  
12 *lux* operon from *Photobacterium luminescens* (*E.coli* K1 A192PP-*lux2*). 20µl of mid-logarithmic-phase  
13 *E.coli* (1x10<sup>2</sup> *E.coli* K1 A299 resuspended in 10mM phosphate buffer), or 20µl of phosphate-buffered  
14 saline (PBS) in control animals, was delivered into the vagina of pregnant mice anaesthetised with  
15 isoflurane using a 200-ml pipette tip on embryonic day 16.5.

16 Following bacterial administration, mice were placed in individual cages and continuously monitored  
17 with individual closed-circuit television cameras and a digital video recorder<sup>68</sup>. Time to delivery was  
18 recorded and defined as the number of hours from the time of bacterial administration to delivery of  
19 the first pup. The number of live and dead pups were recorded. Living pups were weighed daily and  
20 were culled if there was a 10% loss in body weight (in accordance with PPL 70/8030).

#### 21 *Whole-body bioluminescence imaging*

22 Adult mice were anaesthetised with isoflurane in 100% oxygen. Neonatal mice (up to postnatal day  
23 6) remained conscious during imaging<sup>69</sup>. Mice were imaged using a cooled charged-coupled device

1 camera, (IVIS machine, Perkin Elmer, Coventry, UK) for between 1 second and 5 minutes. The  
2 regions of interest (ROI) were measured using Living Image Software (Perkin Elmer) and expressed as  
3 photons per second per centimetre squared per steradian (photons/second/cm<sup>2</sup>/sr).

#### 4 **Tissue collection**

5 Non-pregnant mice were sacrificed 72 hours after viral vector administration. Pregnant mice were  
6 sacrificed 18 hours and 24 hours after intravaginal infection. Mice were anaesthetised using  
7 isoflurane, the right atrium incised, and PBS injected into the left ventricle for exsanguination.  
8 Uterine tissue was stored in 4% PFA. Embryos were stored in 10% neutral-buffered formalin. A  
9 separate cohort of mice were sacrificed by cervical dislocation and vagina, cervix, uterus, placenta  
10 and fetal membranes were collected and stored at -20°C for protein analysis.

#### 11 **Storage of fixed cervical and vaginal tissues**

12 Cervical and vaginal tissues were stored in 4% PFA for 48 hours, transferred to 30% sucrose at 4°C  
13 then 40µm transverse sections obtained using a microtome. Embryos were stored in 10% neutral-  
14 buffered formalin for 48 hours, followed by storage in 70% ethanol before paraffin embedding and  
15 sectioning at 5µm.

#### 16 ***Ex vivo* luminometry**

17 Tissue samples were lysed with 500µl of 1x Lysis buffer (Promega) followed by homogenisation. The  
18 homogenates were centrifuged for 10 minutes at 18000g and the supernatants collected. Each  
19 sample was loaded on to a white 96 well plate. 1.5mM of luciferase (Promega) was added at a 1:1  
20 volume ratio to the sample. A FluoStar Omega microplate reader (BMG labtech) was used to read  
21 the luminescence and the results were analysed using MARS data analysis data software (BMG  
22 labtech).

#### 23 **HBD3 enzyme-linked immunosorbent assay (ELISA)**

1 HBD3 concentrations in vaginal lavage was measured by ELISA (PeproTech, London, UK) per  
2 manufacturer's instructions. Results were read using the FluoStar Omega microplate reader and  
3 analysed in MARS data analysis data software.

#### 4 **GFP immunohistochemistry and co-localisation immunofluorescence**

5 Representative sections of the organ were selected, mounted onto double-coated chrome gelatin  
6 Superfrost slides (VWR, Leicestershire, UK) and left to dry. The slides were placed in 4% PFA for 10  
7 minutes followed by washing in TBS (1x Tris-buffered saline). They were treated with 30% H<sub>2</sub>O<sub>2</sub> in  
8 TBS for 30 minutes at room temperatures and then blocked with 15% normal goat serum (Vector  
9 Laboratories, Peterborough, U.K.) in 0.1% TBS-T (0.1% of Triton X-100 in 1x TBS) for 30 minutes at  
10 room temperature. This was followed by incubation in primary anti-GFP antibody (Abcam,  
11 Cambridge, U.K.) in 10% normal goat serum in 0.1% TBS-T overnight at 4°C. The slides were washed  
12 and secondary antibody (Abcam, Cambridge, U.K.) in 10% serum in 0.1% TBS-T was added for 2  
13 hours at room temperature. Following this the slides were incubated for 2 hours in ABC Vectastain  
14 (Vector Labs, Peterborough, UK). Slides were transferred into DAB solution (0.05% 3,3'-  
15 diaminobenzidine (DAB) in TBS with 30% H<sub>2</sub>O<sub>2</sub> and left for 2 to 3 minutes. The slides were air dried,  
16 dehydrated in 100% ethanol and placed in HistoClear (National diagnostics, USA), followed by cover  
17 slipping with DPX mounting solution.

18 A similar protocol was followed for co-localisation immunofluorescence staining; slides were  
19 incubated in two primary antibodies (in 10% normal goat serum in 0.1% TBS-T); anti-GFP antibody  
20 (Abcam, Cambridge UK) and anti-pan cytokeratin antibody (Abcam, Cambridge, UK) or anti-HBD3  
21 antibody (Abcam, Cambridge, UK). This was followed by incubation with two corresponding  
22 Alexafluor secondary antibodies (Abcam, Cambridge, U.K.) in 10% normal goat serum in 0.1% TBS-T.  
23 Sections were then incubated with DAPI for 2 to 3 minutes and then washed in TBS. The sections  
24 were dried away from direct sunlight and then coverslips mounted using Fluoromount-G. Sections  
25 were stored at 4°C.



## 1 **Neutrophil immunohistochemistry and influx quantification**

2 Neutrophil immunohistochemistry was performed using the same protocol to GFP  
3 immunohistochemistry above; with primary rat anti-Ly6g antibody and Goat anti-rat secondary  
4 antibody (Abcam, Cambridge, U.K.).

5 Cervical sections were visualised using a x5 objective lens and the epithelium and sub-epithelial  
6 stromal areas were identified. 5 random fields of view were selected using a x40 objective lens. The  
7 numbers of neutrophils were counted per area. 5 sections were counted per mouse and the number  
8 of neutrophils counted per area averaged per mouse

## 9 ***E. coli* immunofluorescence**

10 Formalin-fixed embryos were paraffin embedded and sectioned. Paraffin embedded slides were  
11 placed in Histoclear for 10 minutes and then rehydrated in ethanol. Antigen retrieval was then  
12 performed by boiling the slides in citrate buffer for 20 minutes followed by washing in 1xTBS. Slides  
13 were blocked with 15% normal goat serum in 0.1% TBS-T for 30 minutes at room temperature. This  
14 was followed by incubation in primary rabbit anti-*E. coli* antibody (Abcam, Cambridge, U.K.) in 10%  
15 normal goat serum in 0.1% TBS-T overnight at 4°C. The slides were washed and secondary Goat anti-  
16 rabbit IgG H&L Alexa Fluor® 488 (Abcam, Cambridge, U.K.) antibody in 10% serum/ 0.1% TBS-T was  
17 added for 2 hours at room temperature. Following this the slides were incubated for 2 hours in ABC  
18 Vectastain (Vector Labs, Peterborough, UK). Slides were transferred into DAB solution (0.05%  
19 DAB/30% H<sub>2</sub>O<sub>2</sub>/TBS) and left for 2 to 3 minutes. The slides were air dried, dehydrated in 100%  
20 ethanol and placed in Histoclear (National diagnostics, USA), followed by cover slipping with DPX  
21 mounting solution.

## 22 ***E. coli* killing assays**

23 *E. coli* K1 was grown to mid-logarithmic phase and diluted to 1x10<sup>5</sup> colony forming units(CFU)/ml. The  
24 bacteria were centrifuged at 14000g for 3 minutes. The pellet was washed once in 10mM phosphate  
25 buffer followed by further centrifugation and re-suspension in 10mM phosphate buffer. In a 96 well

1 plate, 90µl of the resuspended bacteria was mixed with 90µl vaginal lavage or 10mM phosphate  
2 buffer. The plate was incubated for 30 minutes at 37°C. 20µl of each sample was then mixed with  
3 PBS (to inhibit further AMP activity). Serial dilutions were then plated and placed at 37°C overnight.  
4 CFUs were counted the following morning.

5

#### 6 **Cervical inflammatory cytokine analyses by quantitative PCR**

7 In a separate cohort of mice; cervixes were collected and stored in *RNAlater* at -80°C for quantitative  
8 PCR (qPCR) analysis. Total RNA was extracted using the RNeasy mini kit (Qiagen, UK), as per the  
9 manufacturer's guidelines. Total RNA was reverse transcribed with the High Capacity cDNA Reverse  
10 Transcription kit (Applied Biosystems, USA). Primer sets were obtained from Life Technologies  
11 (Supplementary Table 1) and qPCR was performed in the presence of SYBR green. Target gene  
12 expression was normalized for RNA loading by using *GAPDH*, using the  $2^{-\Delta\Delta Ct}$  method of analysis. All  
13 qPCR analyses were performed on an Applied Biosystems QuantStudio 3 instrument (Applied  
14 Biosystems, USA).

#### 15 **Bacterial DNA extraction**

16 DNA extraction of bacterial DNA from frozen vaginal lavage samples was done using Qiagen spin  
17 protocol as per manufacturer's instructions with an additional bead beating step (Qiagen DNA mini  
18 kit, Denmark).

#### 19 **16S DNA sequencing**

20 The DNA from the above step was quantified using a Qubit DNA high sensitivity assay kit and Qubit  
21 2.0 machine (Thermo Fisher Scientific, UK). The DNA concentration in each well was normalised to  
22 the lowest concentration sample. The DNA was then pooled including negative DNA extraction  
23 controls. This library was diluted to 0.4nM after quantification using the Qubit 2.0, standard curve  
24 qPCR and an Agilent high sensitivity DNA kit with the Agilent 2200 TapeStation instrument (Agilent  
25 genomics, Santa Clara, US). Library preparation was carried out using dual-indexed forward and

1 reverse primers, with barcodes. Library preparation PCR was performed. The resulting amplicon was  
2 cleaned and pooled using AMPure XP beads (Beckman Coulter) as per manufacturer's instructions.  
3 Each plate was pooled into an equimolar final library after quantification using a Qubit 2.0 (Life  
4 technologies). Library was loaded onto a MiSeq (Illumina) as per manufacturer's protocol for 500  
5 cycle V2 kits with the addition of custom sequencing primers for read 1, read 2 and index 1. Data  
6 was analysed using QIIME software (v1.8.0).

## 7 **Statistics**

8 Data are expressed as means  $\pm$  SEM. Time-to-delivery data were log-transformed before analysis,  
9 and the proportion of live born pups was arc-sin transformed before analysis. Data were analyzed by  
10 unpaired *t*-tests, one-way ANOVAs and two-way ANOVAs (with post-hoc Bonferroni tests). All  
11 statistical analyses were performed with GraphPad Prism software version 7.0.  $P < 0.05$  was  
12 considered statistically significant.

13

14

15

16

17

18

19

20

21

22

1

2

3

4

5

6

7 **References**

- 8 1. Blencowe, H. *et al.* National, regional, and worldwide estimates of preterm birth rates in the  
9 year 2010 with time trends since 1990 for selected countries: A systematic analysis and  
10 implications. *Lancet* **379**, 2162–2172 (2012).
- 11 2. Moore, T. *et al.* Neurological and developmental outcome in extremely preterm children born  
12 in England in 1995 and 2006: the EPICure studies. *Br. Med. J.* **345**, 217–24 (2012).
- 13 3. Howson, C. P., Kinney, M. V, McDougall, L., Lawn, J. E. & Born Too Soon Preterm Birth Action  
14 Group. Born Too Soon: Preterm birth matters. *Reprod. Health* **10**, S1 (2013).
- 15 4. Romero, R. *et al.* The preterm parturition syndrome. *BJOG An Int. J. Obstet. Gynaecol.* **113**,  
16 17–42 (2006).
- 17 5. Agrawal, V. & Hirsch, E. Intrauterine infection and preterm labor. *Semin. Fetal Neonatal Med.*  
18 **17**, 12–19 (2012).
- 19 6. Jones, H. E. *et al.* Differing prevalence and diversity of bacterial species in fetal membranes  
20 from very preterm and term labor. *PLoS One* **4**, e8205 (2009).
- 21 7. Romero, R. Preterm Labor: One syndrome, Many causes. *Science (80-. )*. **18**, 1492–1501  
22 (2011).

- 1 8. Akgul, Y. *et al.* Hyaluronan in cervical epithelia protects against infection-mediated preterm  
2 birth. *J. Clin. Invest.* **124**, 5481–5489 (2014).
- 3 9. Rinaldi, S. F. *et al.* Ultrasound-guided intrauterine injection of lipopolysaccharide as a novel  
4 model of preterm birth in the mouse. *Am. J. Pathol.* **185**, 1201–1206 (2015).
- 5 10. Romero, R. *et al.* Vaginal progesterone decreases preterm birth  $\leq 34$  weeks of gestation in  
6 women with a singleton pregnancy and a short cervix: an updated meta-analysis including  
7 data from the OPPTIMUM study. *Ultrasound Obstet. Gynecol.* **48**, 308–17 (2016).
- 8 11. Goldenberg, R. L., Culhane, J. F., Iams, J. D. & Romero, R. Epidemiology and causes of preterm  
9 birth. *Lancet* **371**, 75–84 (2008).
- 10 12. Mendz, G. L., Kaakoush, N. O. & Quinlivan, J. A. Bacterial aetiological agents of intra-amniotic  
11 infections and preterm birth in pregnant women. *Front. Cell. Infect. Microbiol.* **3**, 58 (2013).
- 12 13. Kindinger, L. M. *et al.* The interaction between vaginal microbiota, cervical length, and vaginal  
13 progesterone treatment for preterm birth risk. *Microbiome* **5**, 6 (2017).
- 14 14. Hein, M., Valore, E. V & Helmig, B. Antimicrobial factors in the cervical mucus plug. 137–144  
15 (2002). doi:10.1067/mob.2002.123034
- 16 15. Becher, N., Adams Waldorf, K., Hein, M. & Uldbjerg, N. The cervical mucus plug: structured  
17 review of the literature. *Acta Obstet. Gynecol. Scand.* **88**, 502–13 (2009).
- 18 16. Kyrgiou, M. *et al.* Proportion of cervical excision for cervical intraepithelial neoplasia as a  
19 predictor of pregnancy outcomes. *Int. J. Gynecol. Obstet.* **128**, 141–147 (2014).
- 20 17. James, C. P. *et al.* Human beta defensin (HBD) gene copy number affects HBD2 protein levels:  
21 impact on cervical bactericidal immunity in pregnancy. *Eur. J. Hum. Genet.* **26**, 434–439  
22 (2018).
- 23 18. Elovitz, M. A. *et al.* Cervicovaginal microbiota and local immune response modulate the risk

- 1 of spontaneous preterm delivery. *Nat. Commun.* **10**, 1–8 (2019).
- 2 19. De Smet, K. & Contreras, R. Human antimicrobial peptides: Defensins, cathelicidins and  
3 histatins. *Biotechnol. Lett.* **27**, 1337–1347 (2005).
- 4 20. Meng, W., Du, R., Wang, Y., Chen, Z. & Ding, Y. Human  $\beta$ -Defensin Messenger RNA is  
5 Overexpressed in the Cervical Epithelia of Patients With Nongonococcal Cervicitis. *J. Low.*  
6 *Genit. Tract Dis.* **17**, 440–445 (2013).
- 7 21. Harder, J., Bartels, J., Christophers, E. & Schröder, J. M. Isolation and Characterization of  
8 Human  $\alpha$ -Defensin-3, a Novel Human Inducible Peptide Antibiotic. *J. Biol. Chem.* **276**, 5707–  
9 5713 (2001).
- 10 22. Hoover, D. M., Wu, Z., Tucker, K., Lu, W. & Lubkowski, J. Antimicrobial characterization of  
11 human beta-defensin 3 derivatives. *Antimicrob. Agents Chemother.* **47**, 2804–2809 (2003).
- 12 23. Pingel, L. C. *et al.* Human beta-defensin 3 binds to hemagglutinin B (rHagB), a non-fimbrial  
13 adhesin from *Porphyromonas gingivalis*, and attenuates a pro-inflammatory cytokine  
14 response. *Immunol. Cell Biol.* **86**, 643–649 (2008).
- 15 24. Abdel-Motal, U. M. *et al.* Prolonged expression of an anti-HIV-1 gp120 minibody to the  
16 female rhesus macaque lower genital tract by AAV gene transfer. *Gene Ther.* **21**, 802–810  
17 (2014).
- 18 25. Abdel-Motal, U. M. *et al.* Anti-gp120 minibody gene transfer to female genital epithelial cells  
19 protects against HIV-1 virus challenge in vitro. *PLoS One* **6**, 1–9 (2011).
- 20 26. Wozniak, K. L., Palmer, G., Kutner, R. & Fidel, P. L. J. Immunotherapeutic approaches to  
21 enhance protective immunity against *Candida vaginitis*. *Med. Mycol.* **43**, 589–601 (2005).
- 22 27. Dalgakiran, F., Witcomb, L. A., McCarthy, A. J., Birchenough, G. M. H. & Taylor, P. W. Non-  
23 invasive model of neuropathogenic *Escherichia coli* infection in the neonatal rat. *J. Vis. Exp.*

- 1 e52018 (2014). doi:10.3791/52018
- 2 28. Suff, N. *et al.* Ascending Vaginal Infection Using Bioluminescent Bacteria Evokes Intrauterine  
3 Inflammation, Preterm Birth, and Neonatal Brain Injury in Pregnant Mice. *Am. J. Pathol.*  
4 (2018). doi:10.1016/j.ajpath.2018.06.016
- 5 29. Mingozzi, F., High, K. A., Dc, W., Mingozzi, F. & High, K. A. gene therapy Review Article  
6 Immune responses to AAV vectors: overcoming barriers to successful gene therapy. **122**,  
7 23–36 (2014).
- 8 30. Gruntman, A. M. *et al.* Stability and compatibility of recombinant adeno-associated virus  
9 under conditions commonly encountered in human gene therapy trials. *Hum. Gene Ther.*  
10 *Methods* **26**, 71–6 (2015).
- 11 31. Schnepf, B. C., Clark, K. R., Klemanski, D. L., Pacak, C. A. & Johnson, P. R. Genetic fate of  
12 recombinant adeno-associated virus vector genomes in muscle. *J. Virol.* **77**, 3495–504 (2003).
- 13 32. Bainbridge, J. W. B. *et al.* Europe PMC Funders Group Long-Term Effect of Gene Therapy on  
14 Leber ' s Congenital Amaurosis. **372**, 1887–1897 (2015).
- 15 33. Tuğcu-Demiröz, F., Acartürk, F. & Erdoğan, D. Development of long-acting bioadhesive  
16 vaginal gels of oxybutynin: Formulation, in vitro and in vivo evaluations. *Int. J. Pharm.* **457**,  
17 25–39 (2013).
- 18 34. Ghahremankhani, A. A., Dorkoosh, F. & Dinarvand, R. PLGA-PEG-PLGA tri-block copolymers as  
19 in situ gel-forming peptide delivery system: effect of formulation properties on peptide  
20 release. *Pharm. Dev. Technol.* **13**, 49–55 (2008).
- 21 35. Jeong, B., Bae, Y. H. & Kim, S. W. In situ gelation of PEG-PLGA-PEG triblock copolymer  
22 aqueous solutions and degradation thereof. *J. Biomed. Mater. Res.* **50**, 171–177 (2000).
- 23 36. Chang, H. H. *et al.* Preventing preterm births: trends and potential reductions with current

- 1 interventions in 39 very high human development index countries. *Lancet* **381**, 223–234  
2 (2013).
- 3 37. Flenady, V., Hawley, G., Stock, O. M., Kenyon, S. & Badawi, N. Prophylactic antibiotics for  
4 inhibiting preterm labour with intact membranes. in *Cochrane Database of Systematic*  
5 *Reviews* (ed. Flenady, V.) CD000246 (John Wiley & Sons, Ltd, 2013).  
6 doi:10.1002/14651858.CD000246.pub2
- 7 38. LEPPI, T. J. A STUDY OF THE UTERINE CERVIX OF THE MOUSE. *Anat. Rec.* **150**, 51–65 (1964).
- 8 39. Anderson, D. J., Marathe, J. & Pudney, J. The structure of the human vaginal stratum  
9 corneum and its role in immune defense. *Am. J. Reprod. Immunol.* **71**, 618–23 (2014).
- 10 40. Mehta, V. *et al.* Gene Targeting to the Uteroplacental Circulation of Pregnant Guinea Pigs.  
11 *Reprod. Sci.* **23**, 1087–1095 (2016).
- 12 41. Ensign, L. M. *et al.* Mucus-Penetrating Nanoparticles for Vaginal Drug Delivery Protect Against  
13 Herpes Simplex Virus. *Sci. Transl. Med.* **4**, 138ra79-138ra79 (2012).
- 14 42. Beaumont, P. E. *et al.* Cathelicidin Host Defence Peptide Augments Clearance of Pulmonary  
15 *Pseudomonas aeruginosa* Infection by Its Influence on Neutrophil Function In Vivo. *PLoS One*  
16 **9**, e99029 (2014).
- 17 43. Ghosh, S. K. *et al.* Quantification of human beta-defensin-2 and -3 in body fluids: application  
18 for studies of innate immunity. *Clin. Chem.* **53**, 757–65 (2007).
- 19 44. Vornhagen, J. *et al.* Human Cervical Mucus Plugs Exhibit Insufficiencies in Antimicrobial  
20 Activity Towards Group B Streptococcus. *J. Infect. Dis.* **217**, 1626–1636 (2018).
- 21 45. Niyonsaba, F., Ogawa, H. & Nagaoka, I. Human beta-defensin-2 functions as a chemotactic  
22 agent for tumour necrosis factor-alpha-treated human neutrophils. *Immunology* **111**, 273–81  
23 (2004).



- 1 46. García, J. R. *et al.* Identification of a novel, multifunctional beta-defensin (human beta-  
2 defensin 3) with specific antimicrobial activity. Its interaction with plasma membranes of  
3 *Xenopus* oocytes and the induction of macrophage chemoattraction. *Cell Tissue Res.* **306**,  
4 257–64 (2001).
- 5 47. Röhrl, J., Yang, D., Oppenheim, J. J. & Hehlhans, T. Identification and Biological  
6 Characterization of Mouse  $\beta$ -Defensin 14, the Orthologue of Human  $\beta$ -Defensin 3. *J. Biol.*  
7 *Chem.* **283**, 5414–5419 (2008).
- 8 48. Wu, Z. *et al.* Engineering disulfide bridges to dissect antimicrobial and chemotactic activities  
9 of human beta-defensin 3. *Proc. Natl. Acad. Sci. U. S. A.* **100**, 8880–8885 (2003).
- 10 49. Taylor, K. *et al.* Analysis and separation of residues important for the chemoattractant and  
11 antimicrobial activities of beta-defensin 3. *J. Biol. Chem.* **283**, 6631–9 (2008).
- 12 50. Nagaoka, I., Suzuki, K., Niyonsaba, F., Tamura, H. & Hirata, M. Modulation of Neutrophil  
13 Apoptosis by Antimicrobial Peptides. *ISRN Microbiol.* **2012**, 1–12 (2012).
- 14 51. MacIntyre, D. A. *et al.* The vaginal microbiome during pregnancy and the postpartum period  
15 in a European population. *Sci. Rep.* **5**, 8988 (2015).
- 16 52. Borges, S., Silva, J. & Teixeira, P. The role of lactobacilli and probiotics in maintaining vaginal  
17 health. *Arch. Gynecol. Obstet.* **289**, 479–489 (2014).
- 18 53. Wylie, K. M. *et al.* The vaginal eukaryotic DNA virome and preterm birth. *Am. J. Obstet.*  
19 *Gynecol.* **219**, 189.e1-189.e12 (2018).
- 20 54. Wang, X.-F. *et al.* Antimicrobial activity of human  $\beta$ -defensins against lactic acid bacteria. *Nat.*  
21 *Prod. Res.* **29**, 2164–2166 (2015).
- 22 55. Rizzo, A., Losacco, A. & Carratelli, C. R. *Lactobacillus crispatus* modulates epithelial cell  
23 defense against *Candida albicans* through Toll-like receptors 2 and 4, interleukin 8 and human

- 1           β-defensins 2 and 3. *Immunol. Lett.* **156**, 102–109 (2013).
- 2   56.    Semple, F. *et al.* Human beta-defensin 3 affects the activity of pro-inflammatory pathways  
3           associated with MyD88 and TRIF. *Eur. J. Immunol.* **41**, 3291–3300 (2011).
- 4   57.    Boughan, P. K. *et al.* Nucleotide-binding oligomerization domain-1 and epidermal growth  
5           factor receptor: critical regulators of beta-defensins during *Helicobacter pylori* infection. *J.*  
6           *Biol. Chem.* **281**, 11637–48 (2006).
- 7   58.    Meisch, J. P. *et al.* Human β-Defensin 3 Peptide is Increased and Redistributed in Crohn's  
8           Ileitis. doi:10.1097/MIB.0b013e318280b11a
- 9   59.    Jacobsen, F. *et al.* Transient cutaneous adenoviral gene therapy with human host defense  
10          peptide hCAP-18/LL-37 is effective for the treatment of burn wound infections. *Gene Ther.*  
11          **12**, 1494–1502 (2005).
- 12   60.    Hirsch, T. *et al.* Human beta-defensin-3 promotes wound healing in infected diabetic wounds.  
13          *J. Gene Med.* **11**, 220–8 (2009).
- 14   61.    Carretero, M. *et al.* A cutaneous gene therapy approach to treat infection through  
15          keratinocyte-targeted overexpression of antimicrobial peptides. *FASEB J.* **18**, 1931–1933  
16          (2004).
- 17   62.    Xia, Z., Zhang, C., Zeng, Y., Wang, T. & Ai, G. Transplantation of BMSCs expressing hVEGF165  
18          /hBD3 promotes wound healing in rats with combined radiation-wound injury. *Int. Wound J.*  
19          **11**, 293–303 (2014).
- 20   63.    Gonzalez, J. M., Franzke, C. W., Yang, F., Romero, R. & Girardi, G. Complement activation  
21          triggers metalloproteinases release inducing cervical remodeling and preterm birth in mice.  
22          *Am. J. Pathol.* **179**, 838–849 (2011).
- 23   64.    Kirby, M. A. *et al.* Progesterone Receptor–Mediated Actions Regulate Remodeling of the

- 1 Cervix in Preparation for Preterm Parturition. *Reprod. Sci.* **23**, 1473–1483 (2016).
- 2 65. Sundtoft, I., Langhoff-Roos, J., Sandager, P., Sommer, S. & Uldbjerg, N. Cervical collagen is  
3 reduced in non-pregnant women with a history of cervical insufficiency and a short cervix.  
4 *Acta Obstet. Gynecol. Scand.* **96**, 984–990 (2017).
- 5 66. Lawn, J. E. *et al.* Global report on preterm birth and stillbirth (1 of 7): definitions, description  
6 of the burden and opportunities to improve data. *BMC Pregnancy Childbirth* **10 Suppl 1**, S1  
7 (2010).
- 8 67. Martin, J. N., D'Alton, M., Jacobsson, B. & Norman, J. E. In Pursuit of Progress Toward  
9 Effective Preterm Birth Reduction. *Obstet. Gynecol.* **129**, 715–719 (2017).
- 10 68. Migale, R. *et al.* Modeling hormonal and inflammatory contributions to preterm and term  
11 labor using uterine temporal transcriptomics. *BMC Med.* **14**, 86 (2016).
- 12 69. Karda, R. *et al.* Continual conscious bioluminescent imaging in freely moving  
13 somatotransgenic mice. *Sci. Rep.* **7**, 6374 (2017).

14

|               | <b>PTB rates</b> | n  |
|---------------|------------------|----|
| AAV8 HBD3.GFP | <b>60%</b>       | 10 |
| AAV8 GFP      | <b>78%</b>       | 9  |

15

16 **Table 1.** Ascending infection-induced preterm birth rates: Preterm birth rates after intravaginal  
17 administration of *E.coli* K1 on embryonic day 16.5. Data analysed with Fisher exact test.

18

19 **Figure 1.** Intravaginal bioluminescent *E.coli* K1 A192PP-lux2 (*E.coli* K1) can ascend into the pregnant  
20 uterine cavity and induce premature delivery (30). (A) Pregnant mice received intravaginal *E.coli* K1

1 on embryonic day 16.5, bacteria ascend into the uterine cavity over 24 hours. (B) At 18 hours after  
2 *E.coli* K1 administration bacteria is seen specifically within the pregnant uterine cavity and is  
3 detected in the fetal membranes, the placenta and the amniotic fluid by 18 hours. (C) By 24 hours,  
4 bacteria is detected in the fetus. (D) Immunohistochemical detection of *E.coli* in the fetus shows  
5 *E.coli* specifically within the lung alveoli and small intestine at 24 hours, whilst no *E.coli* is seen in the  
6 uninfected fetus (sections counterstained with haematoxylin), n=3, Scale bar 40µm. (E) By Postnatal  
7 day 1 (72 hours after infection), *E.coli* is clearly seen in the Gastrointestinal tract.

8

9 **Figure 2.** Gene delivery to the cervix is possible using viral vectors. (A) Adenovirus-associated virus-8  
10 (AAV-8), Recombinant adenovirus 5 (rAd5), VSVg lentiviral vectors can deliver luciferase to the cervix  
11 resulting in transient luciferase expression. (B, C) 72 hours following AAV8-CMV-f.luc administration,  
12 luciferase expression is limited to the cervix and upper vagina, n=3. \*\*\*\*P<0.0001, data were  
13 analyzed by a 1-way ANOVA with post-hoc Bonferroni test. Gene transfer to the cervix using AAV 8  
14 viral vector is improved when delivered with the pluronic gel, AK12, and results in transient protein  
15 expression in the epithelial cell layers. (D) Cervical GFP expression is increased when AAV8 GFP is  
16 delivered in combination with AK12, compared with AAV8 GFP delivery alone, n=3. \*P<0.05, data  
17 were analyzed by a unpaired T-test. (E) GFP expression is detected in the epithelial layers of the  
18 cervix, confirmed by protein co-localisation with cytokeratin expression. Scale bar 20µm. (F)  
19 Following delivery of AAV8-CMV-f.luc in combination with AK12 gel, luciferase expression in the  
20 cervix lasted for up to 14 days, with peak expression occurring between day 3 and day 5, n=3.

21

22 **Figure 3.** Cervical delivery of the AAV8 HBD3.GFP vector results in HBD3 peptide expression in the  
23 epithelial layers of the cervix and upper vagina and is secreted into the vaginal fluid. (A) Upper  
24 vaginal and cervical tissue were harvested 72 hours after vector or PBS administration. HBD3 and  
25 GFP are detected in the cervix and vagina following AAV HBD3.GFP administration, n=3. Scale bar

1 20µm. (B) Vaginal lavage was collected from a different cohort of mice 96 hours after administration  
2 of the vector or PBS, n=3. \*P<0.05, data were analyzed by an unpaired T-test.

3

4 **Figure 4.** AAV8 HBD3.GFP increases neutrophil recruitment to the upper cervical epithelial layers. (A)  
5 *E.coli* killing assays were performed on vaginal lavages from AAV8 HBD3.GFP, AAV8 GFP and PBS  
6 treated mice. There was no difference in bacterial kill, n=3. Data were analysed with a 1-way ANOVA  
7 and post-hoc Bonferroni tests. (B) Representative images of cervical neutrophil localization using  
8 immunohistochemical staining of Ly-6g with haematoxylin counterstain. Brown coloration depicts  
9 DAB-positive cells, Scale bar 20µm. (C) Neutrophil numbers in cervical epithelial cell layers were  
10 increased following AAV8 HBD-3 transduction, compared with AAV8 GFP and PBS, n=3. \*P<0.05,  
11 \*\*P<0.005, data were analysed with a 1-way ANOVA and post-hoc Bonferroni tests (

12

13 **Figure 5.** Delivery of AAV8 HBD3.GFP reduces bacterial ascent into the pregnant uterine cavity and  
14 increases the proportion of pups born alive. (A) An example of an AAV8 HBD3.GFP treated mouse  
15 and an AAV8 GFP treated mouse 24 hours after bacterial administration. (B) Marked difference in  
16 uterine bacterial bioluminescence in mice treated with AAV8 HBD3.GFP, compared with AAV8 GFP,  
17 n=10. \*\*P<0.01, data were log-transformed and analysed with a repeated measures 2-way ANOVA  
18 with post-hoc Bonferroni tests. (C) The AAV8 HBD3.GFP group delivered significantly earlier than the  
19 control mice not infected with bacteria and the mean time of delivery was not significantly different  
20 from that of the AAV8 GFP group n=10. \*P<0.05, \*\*\*P<0.001, data were log transformed and  
21 analysed with a 1-way ANOVA and post hoc Bonferroni tests. (D) There was an increase in the  
22 proportion of pups born alive in the AAV8 HBD3.GFP treated group, compared with the AAV8 GFP  
23 group, n=10. \*P<0.05, data were arc-sin transformed and analysed with an unpaired test.

24

1 **Figure 6.** There is no difference in pup survival over the first week of life between AAV HBD3.GFP  
2 and AAV GFP pups, although there is a trend for increased survival in the term AAV HBD3.GFP pups  
3 compared with AAV GFP controls pups. (A) Overall pup survival over the first week of life. (B) Term  
4 pup survival over the first week of life. Term pups were defined as those that were delivered > 48  
5 hours after bacterial administration. n=53 in the AAV HBD3.GFP group, n=27 in AAV GFP group  
6 (Term pups; AAV HBD3.GFP n= 23, AAV GFP n=10). Data analysed by Log-rank Mantel-Cox test.

7

8 **Supplementary Figure 1.** AAV HBD3.GFP does not have an effect on the vaginal microbiome. (A)  
9 Alpha diversity was determined before, at 48 hours and at 168 hours after AAV8 HBD3.GFP  
10 administration, n=5. There was no difference in alpha-diversity values after AAV8 HBD3.GFP,  
11 compared with samples taken before AAV8 HBD3 administration. Data were analysed by a 1-way  
12 ANOVA with post hoc Bonferroni tests to before AAV8 HBD3.GFP samples. (B) The proportion of  
13 bacterial classes present in the vaginal microbiome was determined before and 7 days after AAV8  
14 HBD3.GFP or AAV8 GFP administration, n=5.

15 **Supplementary Figure 2.** AAV HBD3.GFP construct. An AAV8 bicistronic vector encapsidating a  
16 single-stranded DNA sequence containing the HBD3 gene (Vega Sanger HBD3 transcript  
17 VEGA68:CM000670.2) under the transcription activity of the CMV promoter, followed by the eGFP  
18 gene under the transcription activity of a further CMV promoter, and BGH polyA downstream  
19 (Vector Biolabs, Malvern, USA) (Supplementary Figure 2).”

20 **Supplementary Figure 3.** AAV HBD3.GFP does not have an inflammatory cytokine effect on cervical  
21 tissue, compared with AAV GFP. Relative mRNA expression was determined in AAV HBD3 and AAV  
22 GFP cervixes. n=6; data shown as  $2^{-\Delta CT}$  data and analysed by two-way ANOVA with post hoc  
23 Bonferroni tests.

|  |          |
|--|----------|
|  | Sequence |
|--|----------|

|              |                            |
|--------------|----------------------------|
| <i>Gapdh</i> |                            |
| F            | 5'-ACTCCACTCACGGCAAATTC-3' |
| R            | 5'-TCTCCATGGTGGTGAAGACA-3' |
| <i>Il1b</i>  |                            |
| F            | 5'-CAGGCAGGCAGTATCACTCA-3' |
| R            | 5'-AGCTCATATGGGTCCGACAG-3' |
| <i>Tnfa</i>  |                            |
| F            | 5'-TATGGCTCAGGGTCCAACTC-3' |
| R            | 5'-CTCCCTTGCAGAACTCAGG-3'  |
| <i>Il6</i>   |                            |
| F            | 5'-AGTTGCCTTCTGGGACTGA-3'  |
| R            | 5'-TCCACGATTTCCAGAGAAC-3'  |
| <i>Il10</i>  |                            |
| F            | 5'-GGTGAGAAGCTGAAGACCCT-3' |
| R            | 5'-TGTCTAGGTCCTGGAGTCCA-3' |

1

2

Supplementary Table 1: qPCR primer sets

3

4

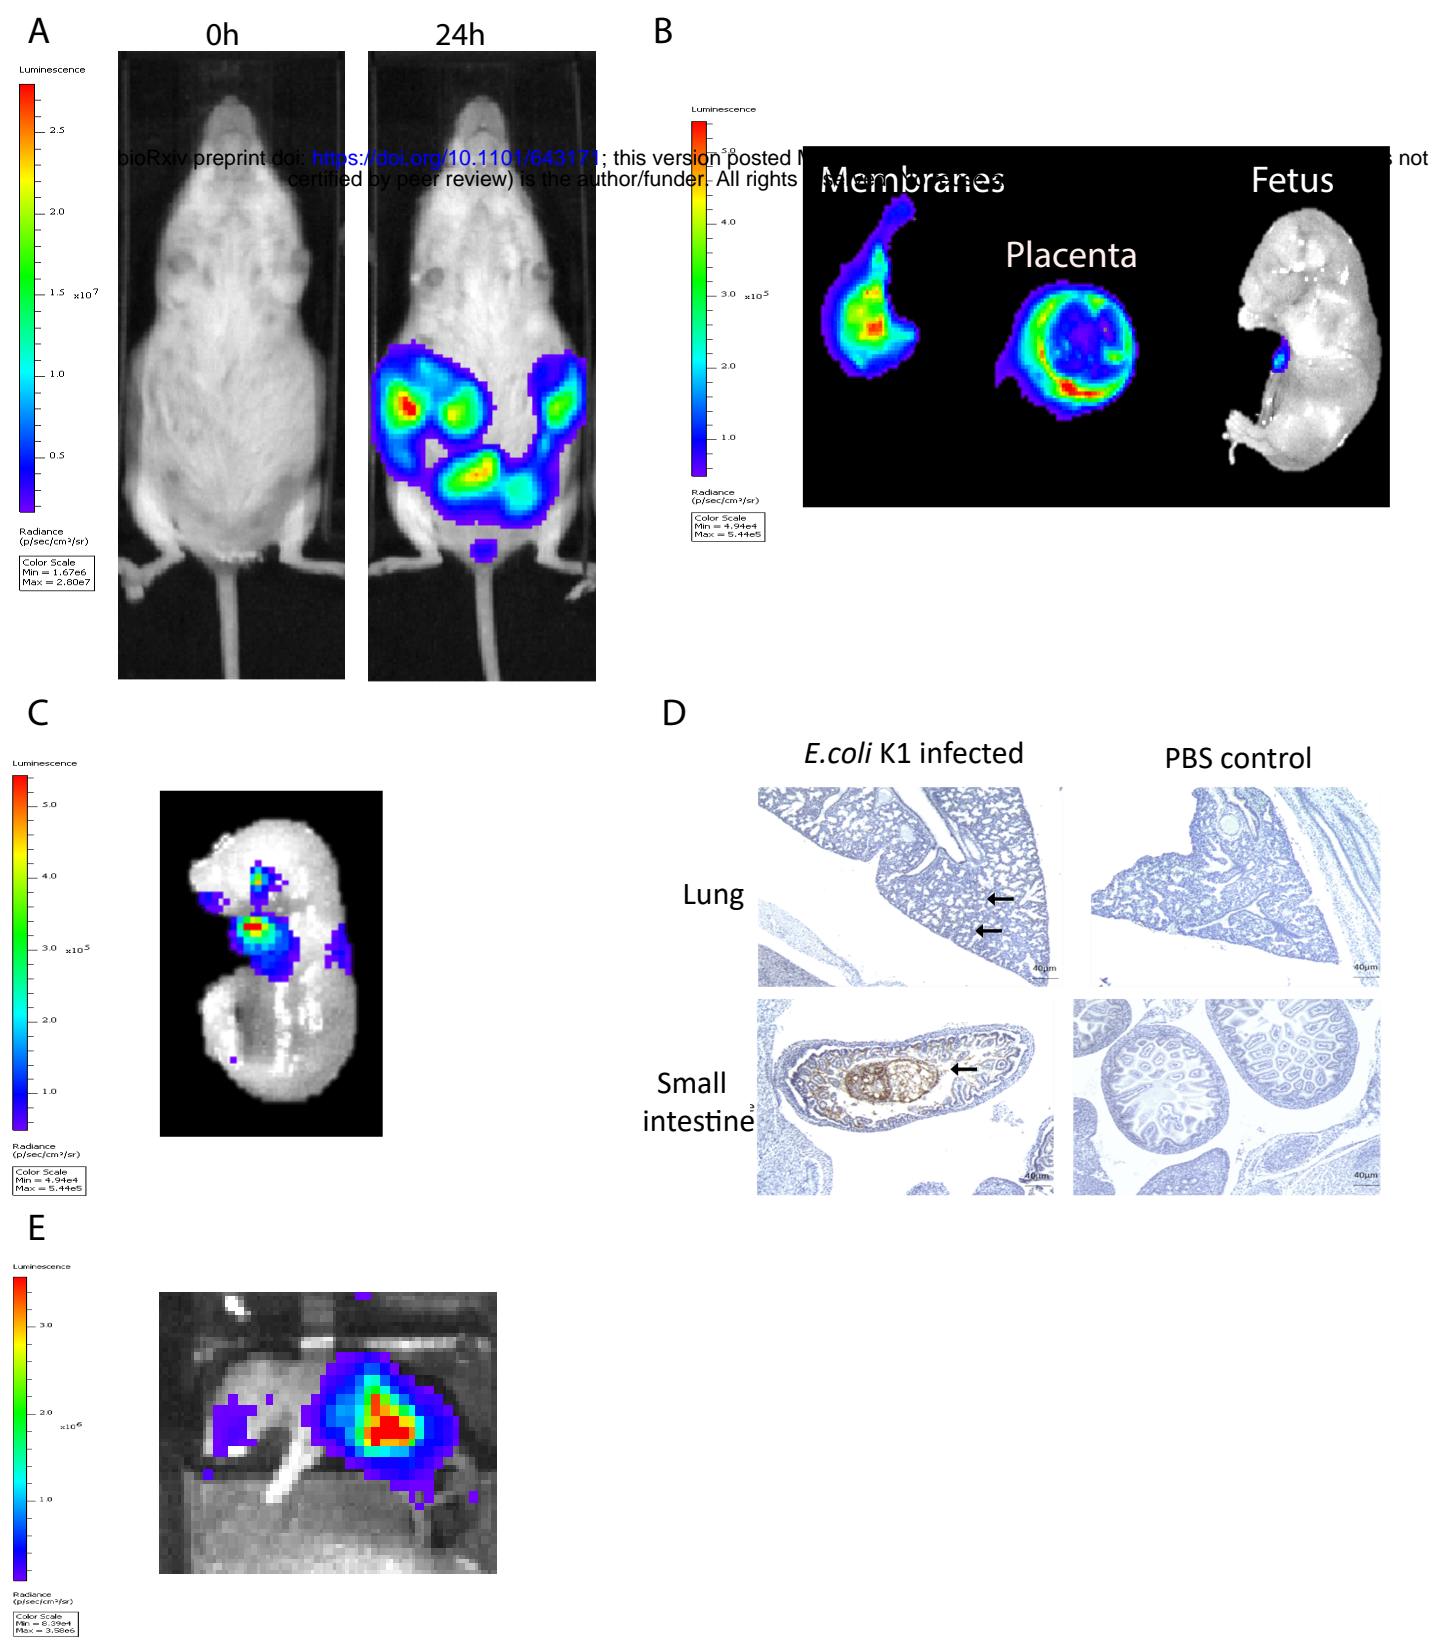

Figure 1



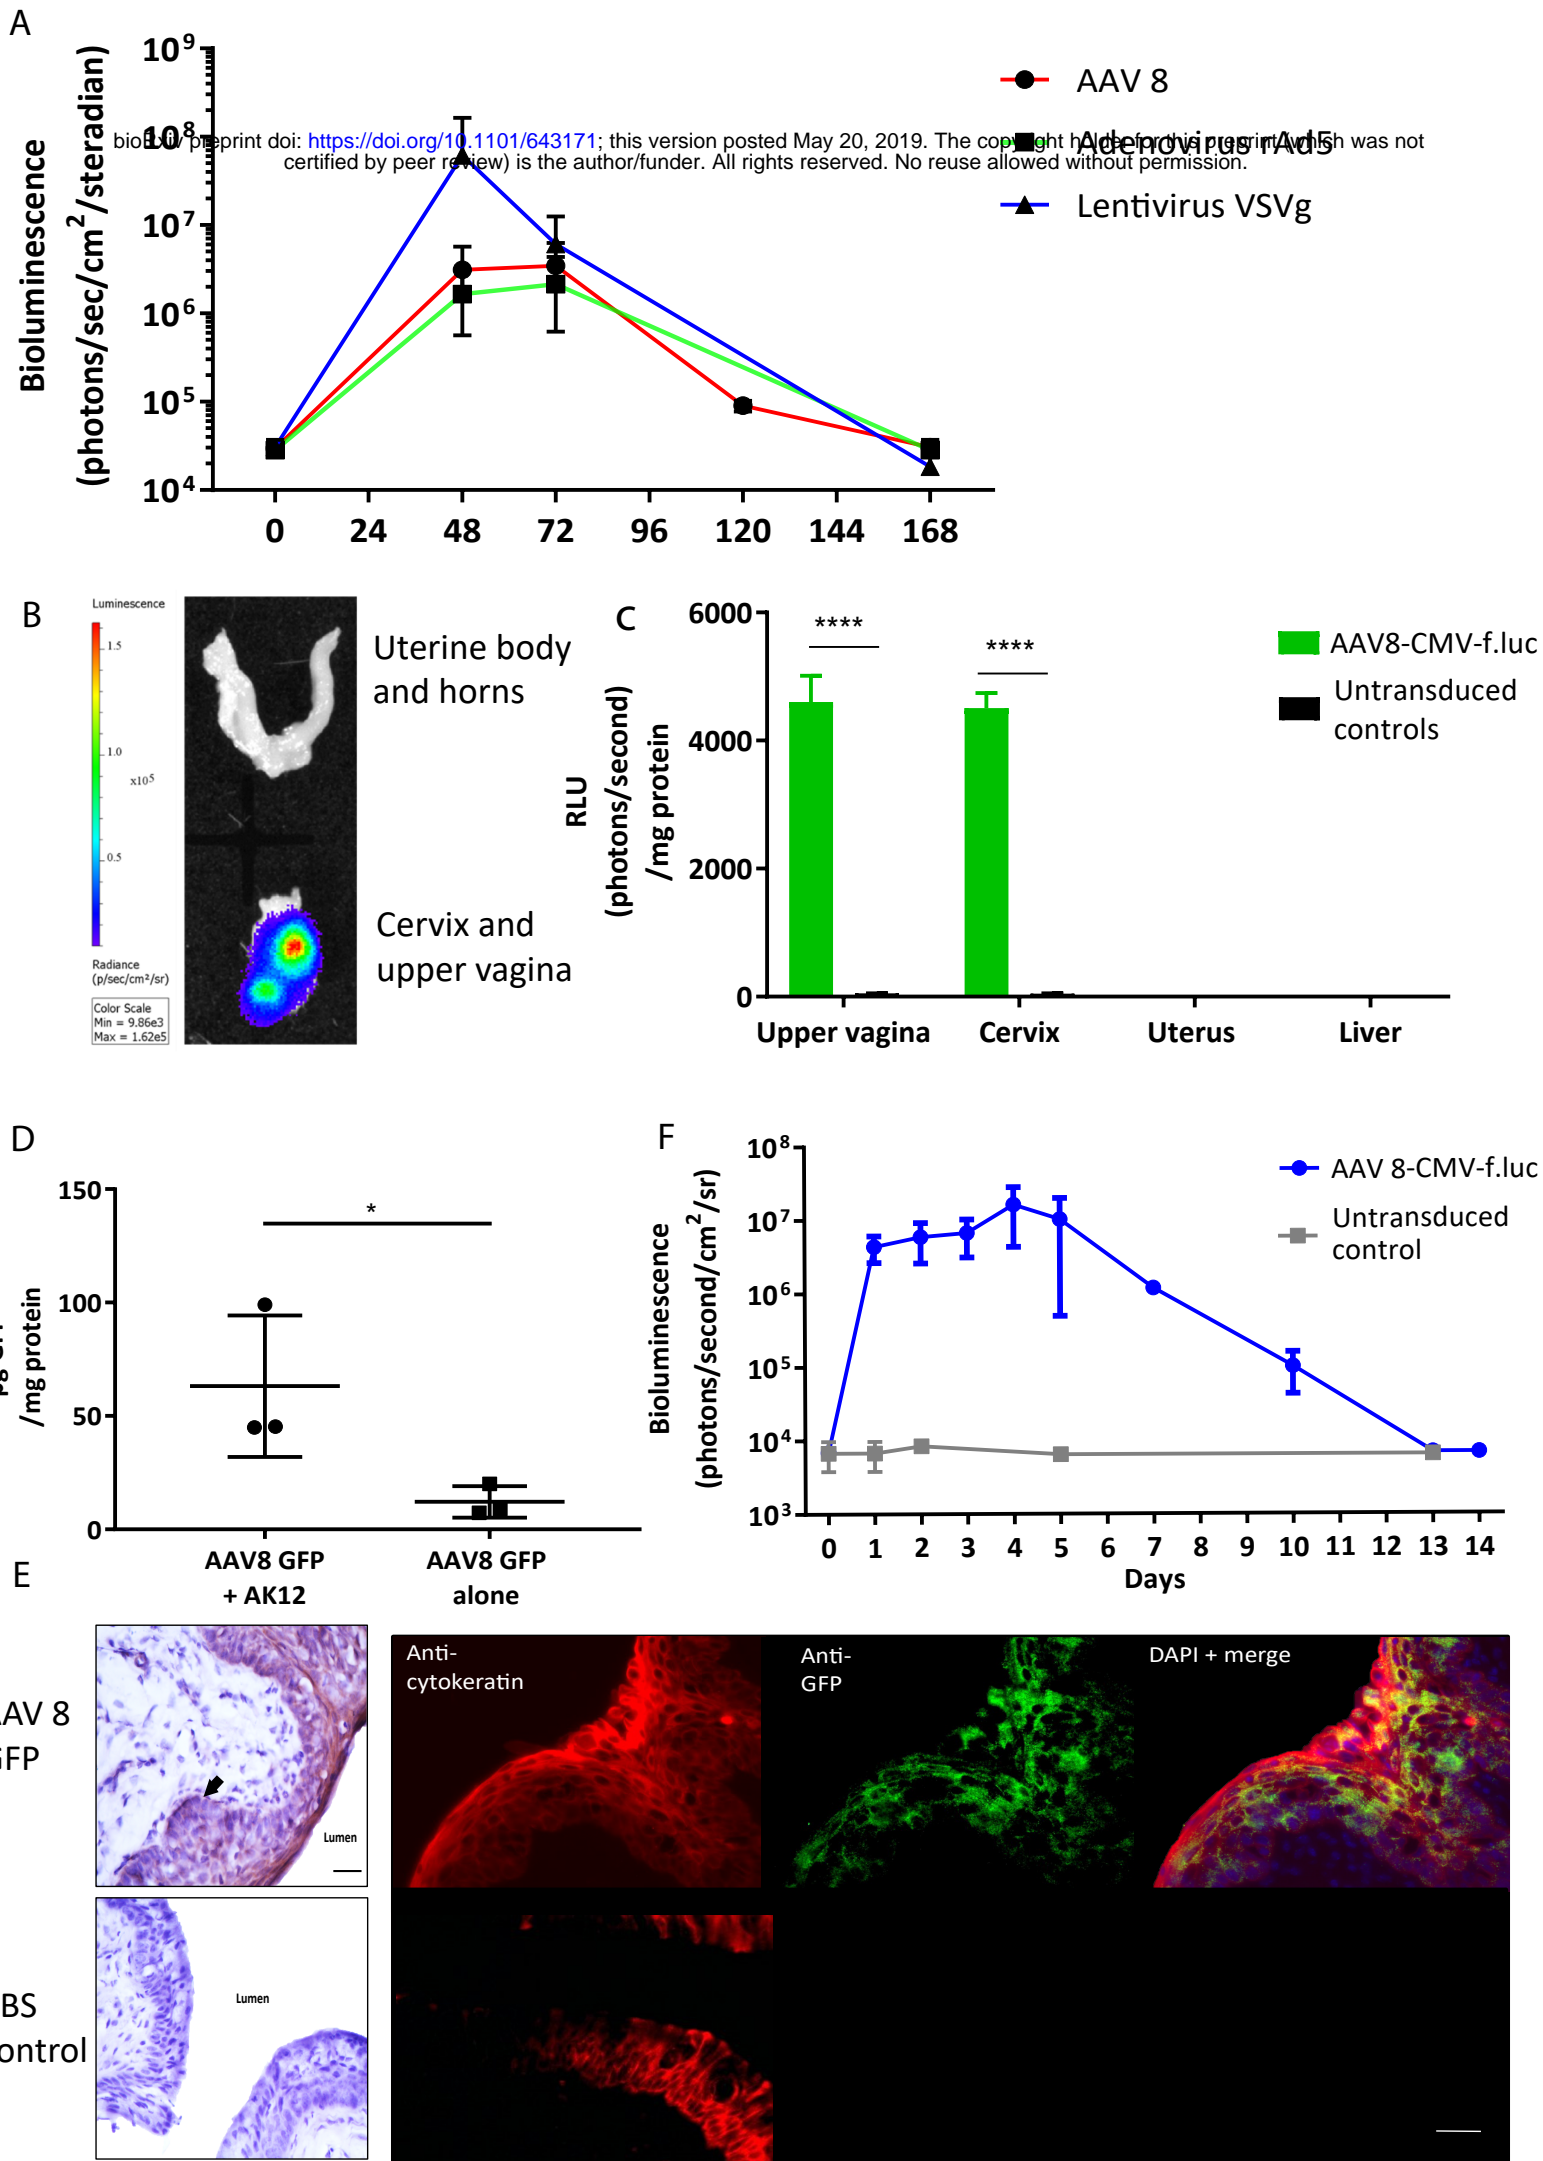

Figure 2

A

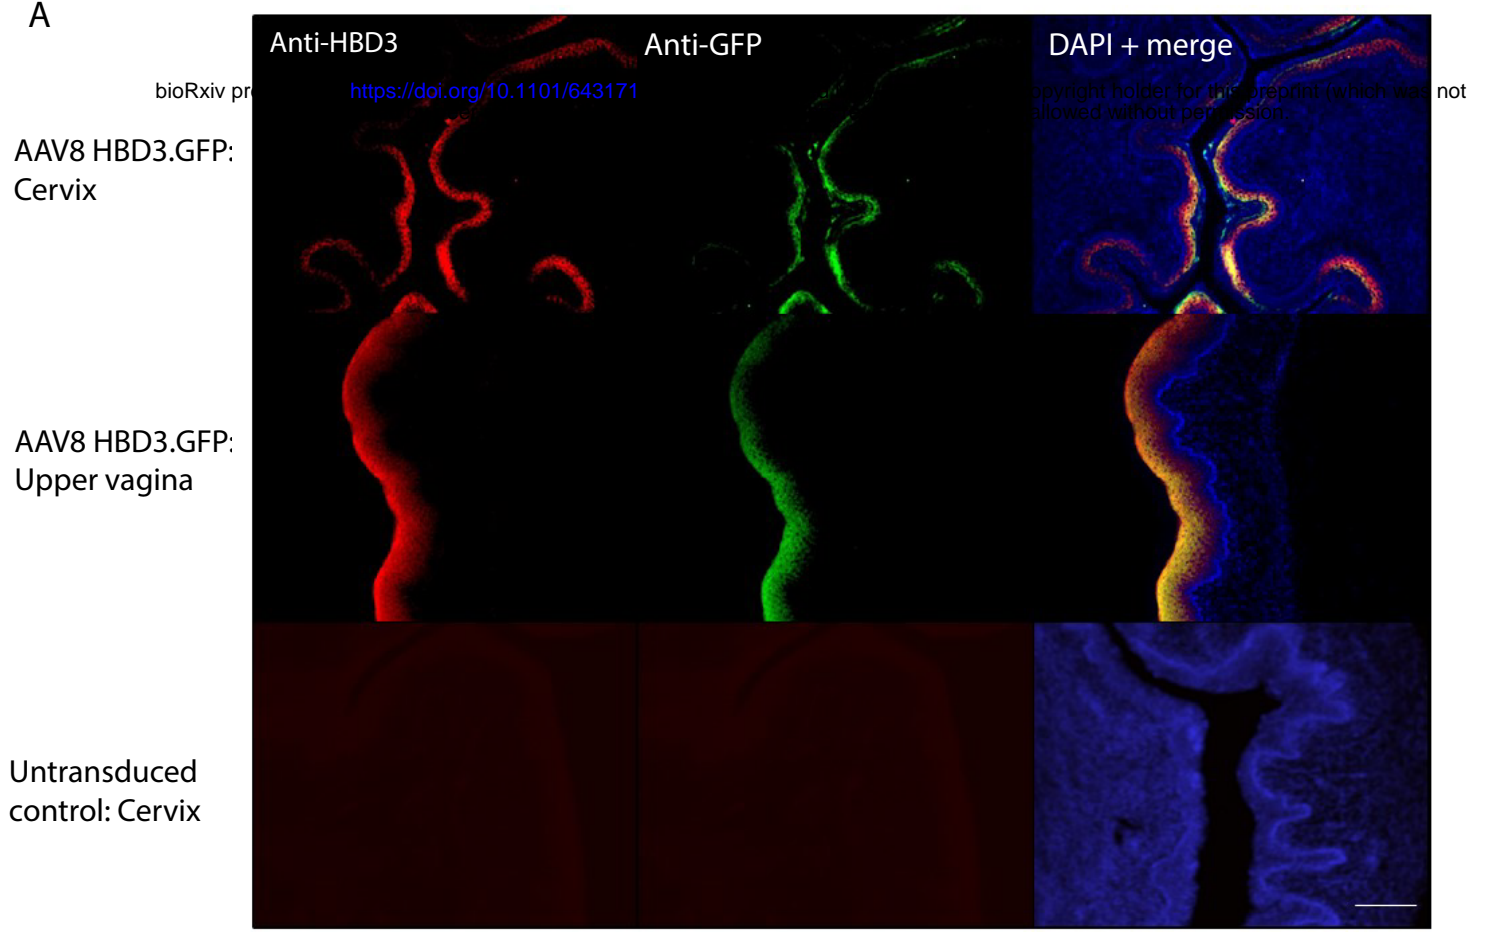

B

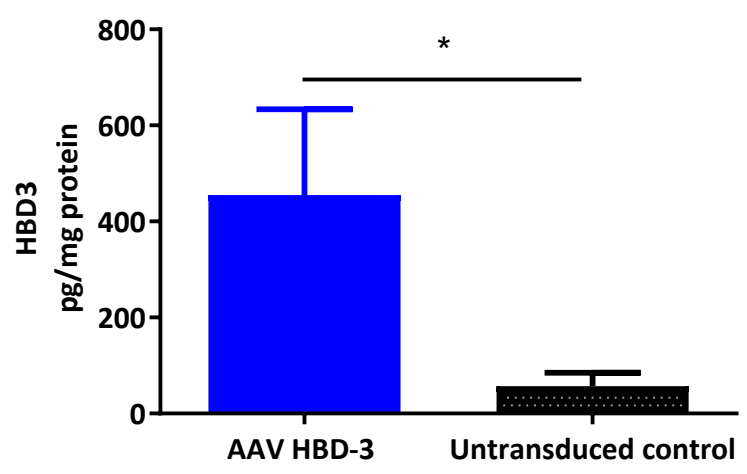

Figure 3

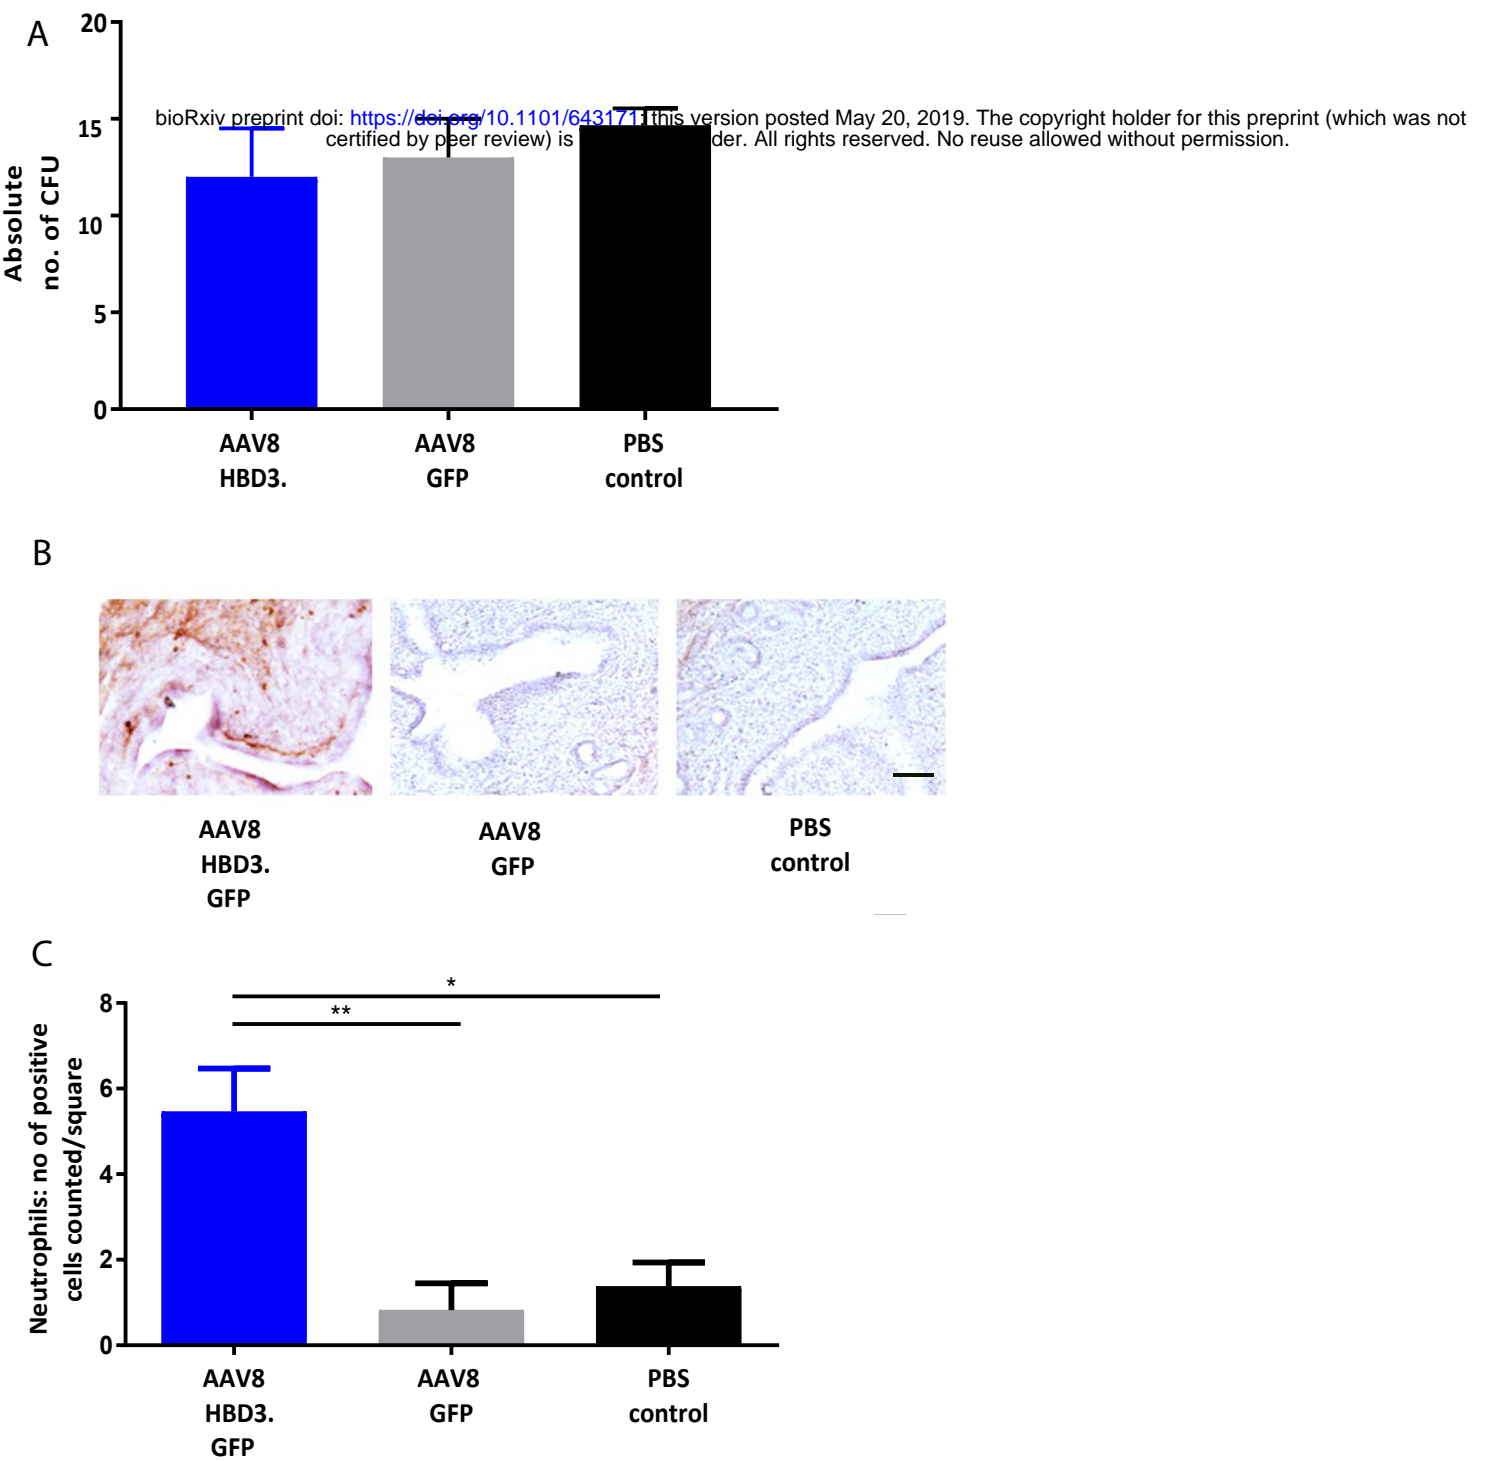

Figure 4

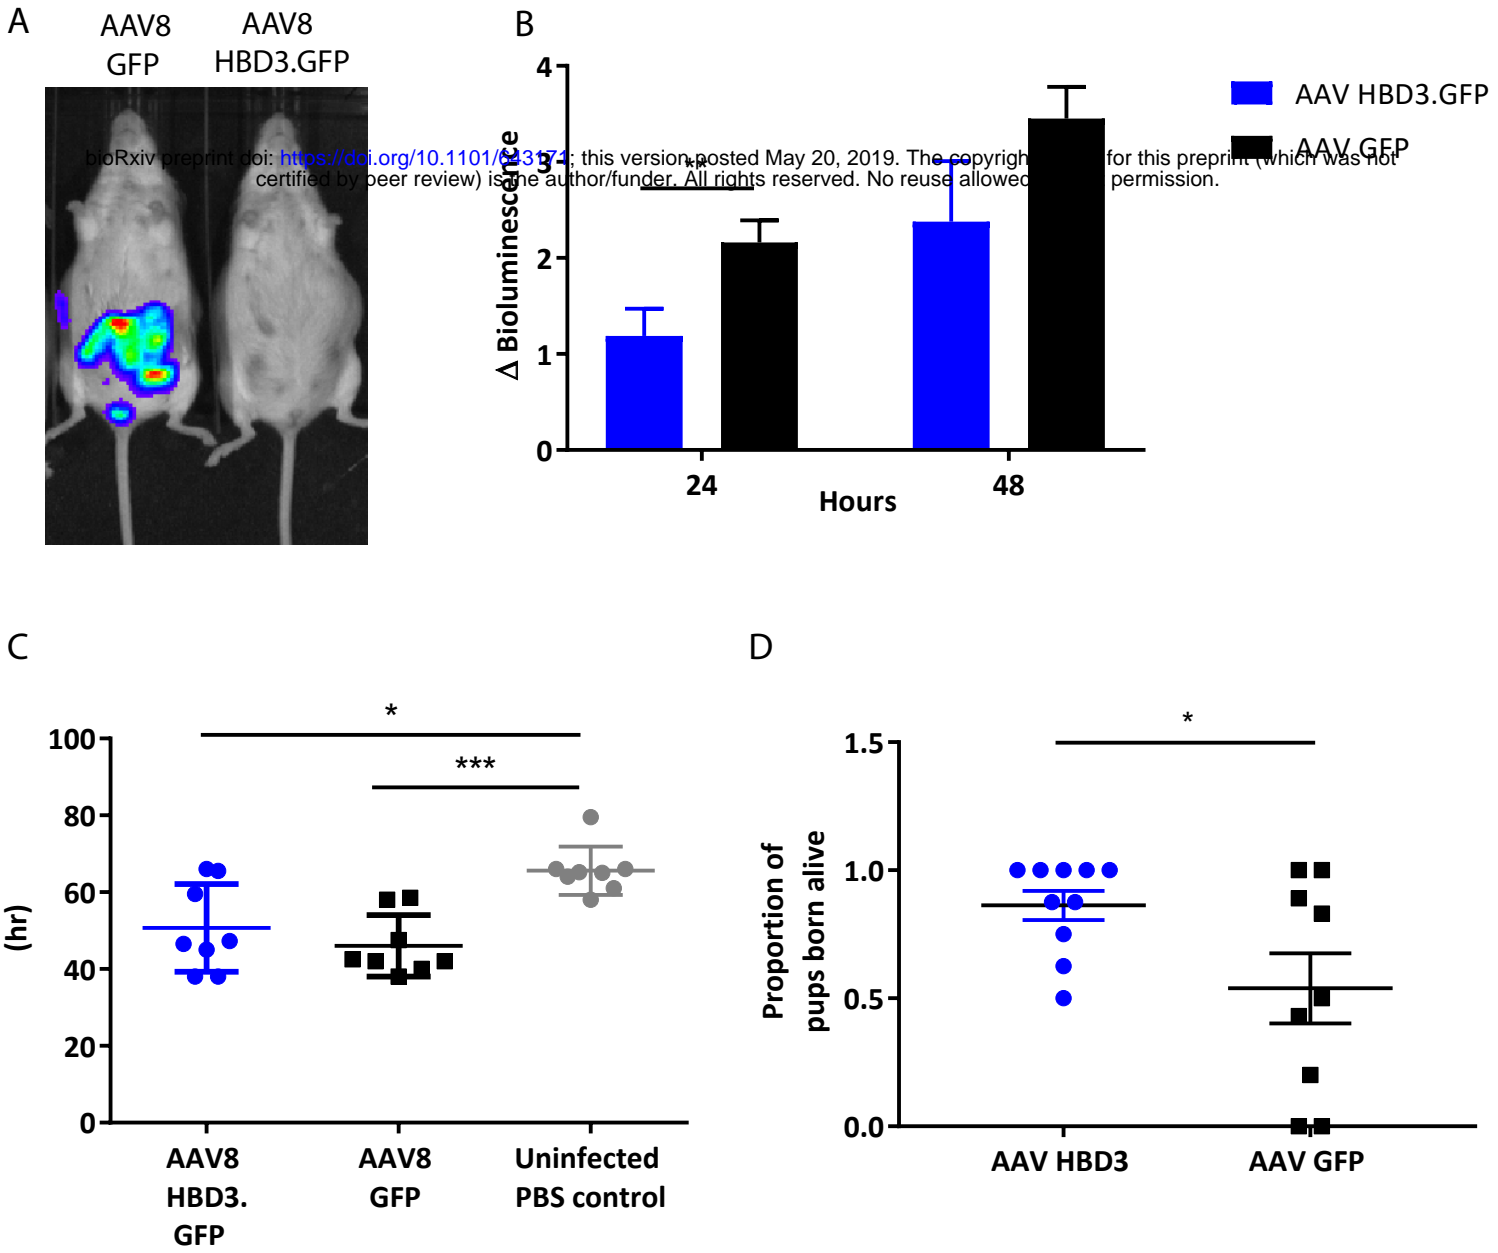

Figure 5

A

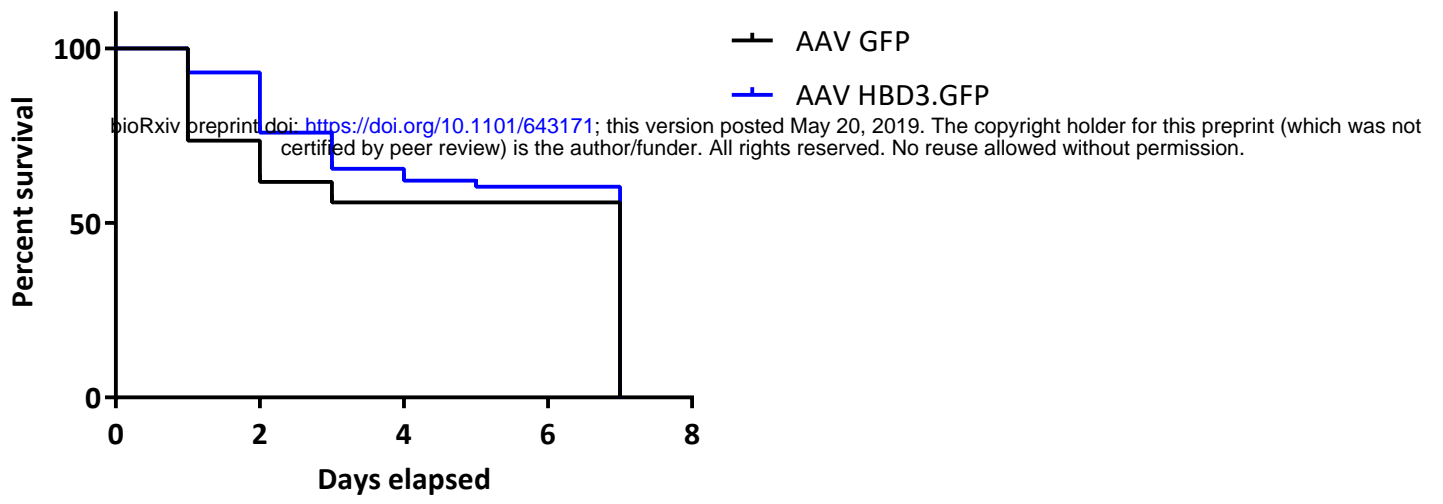

B

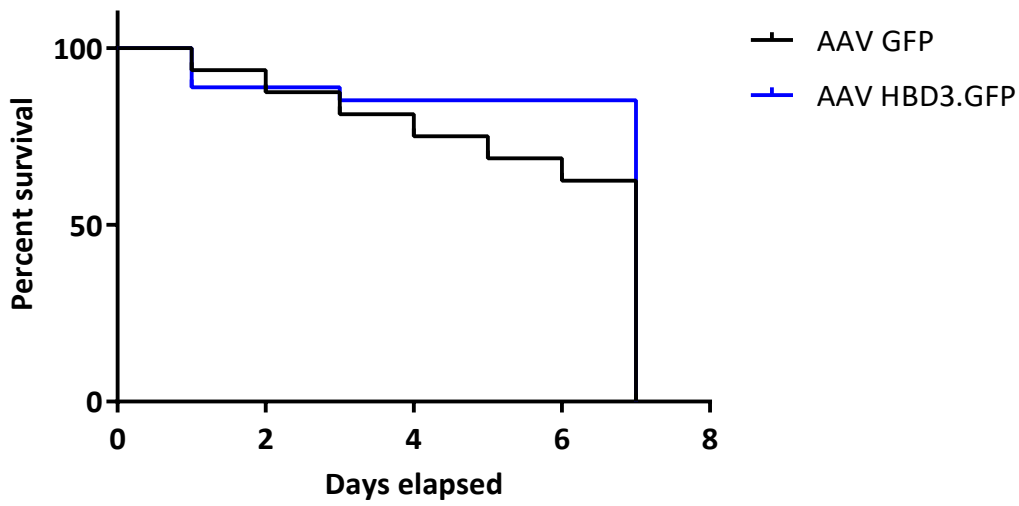

Figure 6

A

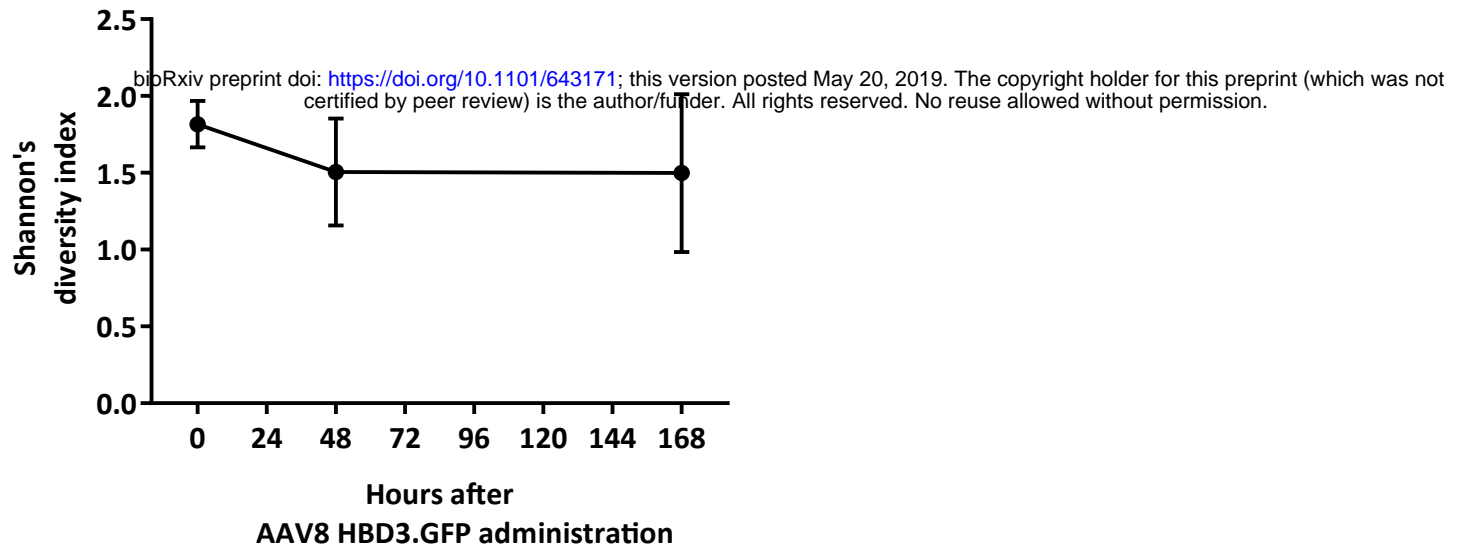

B

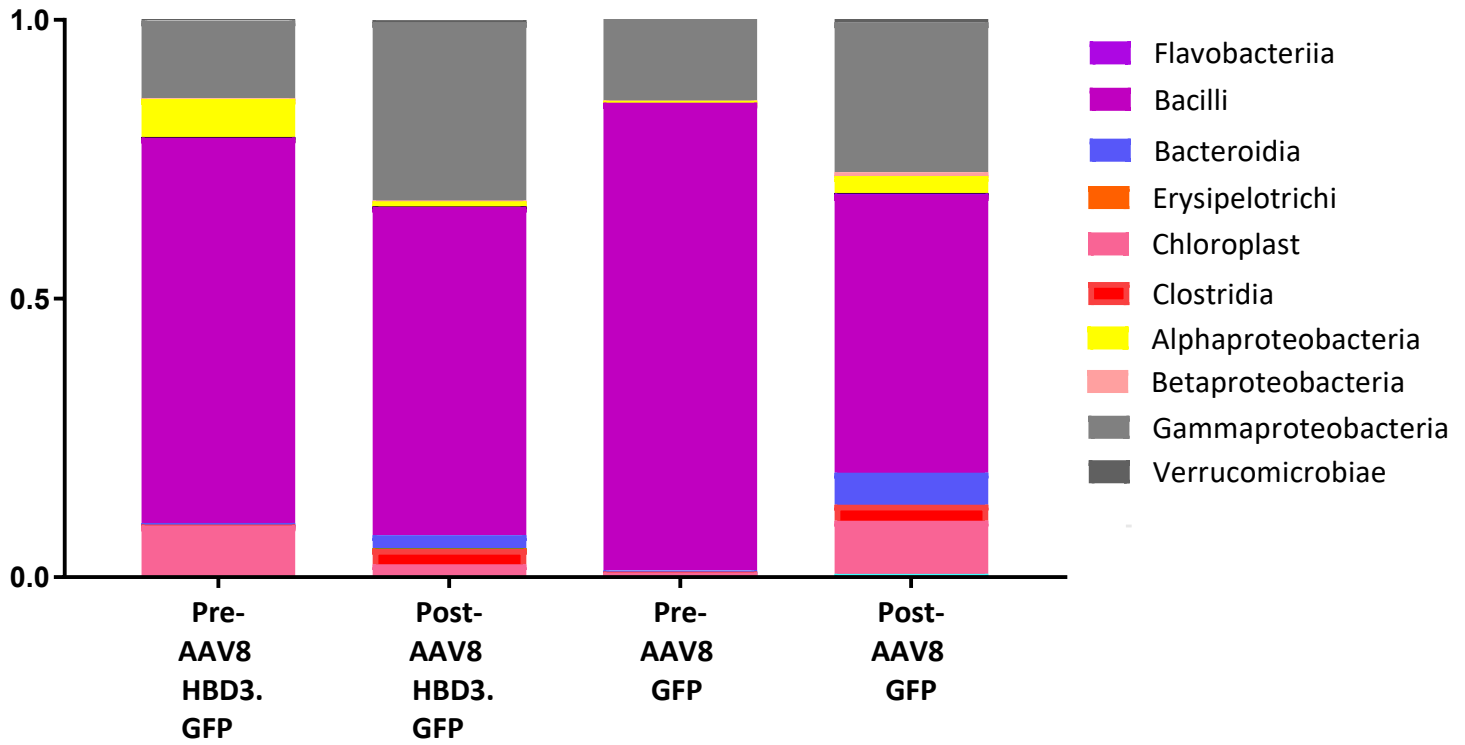

Supplementary Figure 1

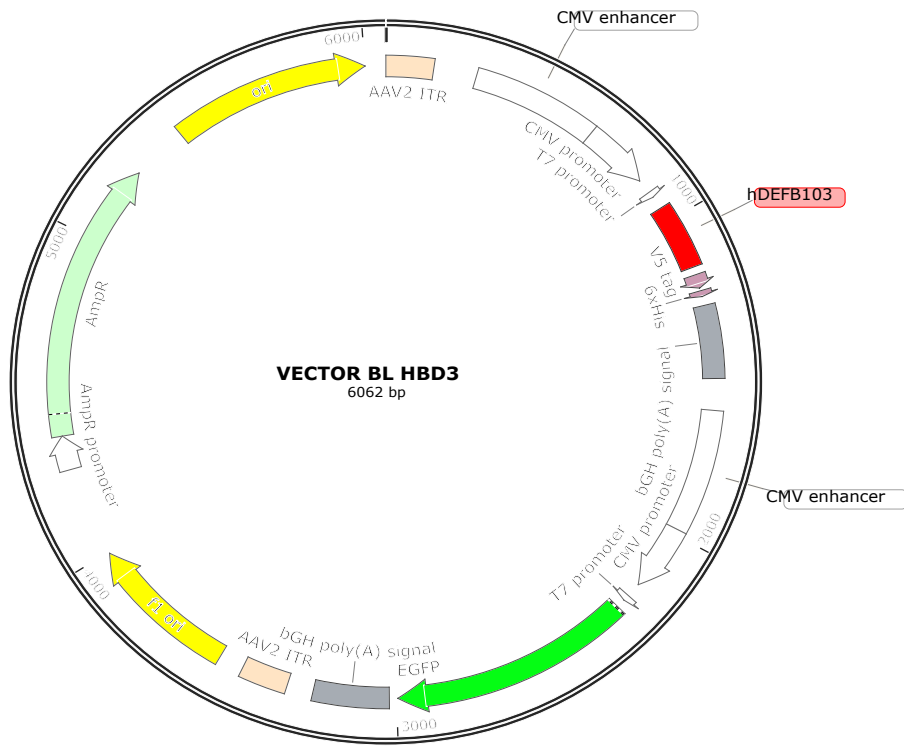

Supplementary Figure 2

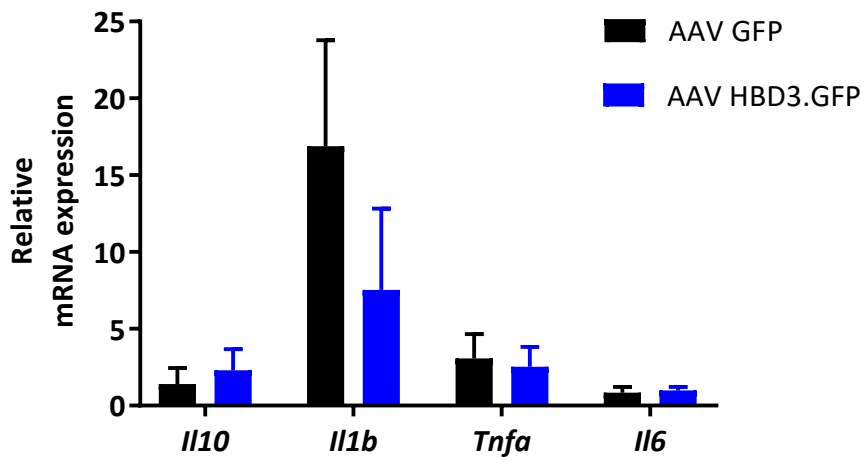

Supplementary Figure 3
